# Supplementary material for: Identifying Lethal Dependencies with HUGE Predictive Power
Source: Cancers (Basel). 2022 Jul 1;14(13):3251. doi: 10.3390/cancers14133251 (PMC9264916; doi:10.3390/cancers14133251)
Supplement: Supplementary file 1 [file cancers-14-03251-s001.zip › Carazo F, San Jose, et al. Supplementary Tables.xlsx]

## Sheet: Supp_Table_S1_VICC_DEMETER_HUGE
Supplementary Table 1. Associations within the top 500 pairs predicted using the HUGE-based and standard pipeline algorithms in AML that match the knowledgebase of clinical interpretations of somatic genomic variants in cancer of the Variant Interpretation for Cancer Consortium (VICC).
Essential Gene	Biomarker Gene	Biomarker type	Difference Essentiality	P_Value	Local_FDR	CancerSite	Method
NRAS	NRAS	MUT	-6.83	4.66973e-08	0.000137795	AML	HUGE
FLT3	FLT3	MUT	-6.36	0.000228048	0.200218	AML	HUGE
TACR2	NRAS	MUT	4.71	0.00921116	0.307189	AML	HUGE
SH2D1A	NRAS	MUT	-4.96	0.0097366	0.314167	AML	HUGE
APBB1	FLT3	MUT	-2.87	0.00554239	0.388977	AML	HUGE
FGF18	NRAS	MUT	2.58	0.0162073	0.389495	AML	HUGE
FLNA	NRAS	MUT	4.53	0.0185154	0.412964	AML	HUGE
IL12RB1	NRAS	MUT	2.62	0.0187087	0.414867	AML	HUGE
FGF13	NRAS	MUT	3.01	0.021023	0.436992	AML	HUGE
CD1C	FLT3	MUT	-3.21	0.00922245	0.466007	AML	HUGE
PPP4C	NPM1	MUT	3.55	0.00134853	0.477868	AML	HUGE
FGF13	FLT3	MUT	-3.09	0.0109182	0.496134	AML	HUGE
CCR7	FLT3	MUT	-3.74	0.0111922	0.500729	AML	HUGE
GATA6	FLT3	MUT	-3.43	0.0118353	0.511234	AML	HUGE
TYMS	FLT3	MUT	-4.22	0.0120857	0.515222	AML	HUGE
SRSF2	NRAS	MUT	3.86	0.0322976	0.530862	AML	HUGE
CCND3	NRAS	MUT	-2.62	0.0335087	0.53984	AML	HUGE
NRAS	NRAS	MUT	-6.69969	1.48474e-08	0.0248783	AML	ST

## Sheet: Supp_Table_S2_Ess. genes AML
Supplementary Table 2. Essential genes for AML. Selected genes meet the following criteria: (i) must be essential in ≥25% of AML cell lines (DEMETER essentiality threshold set to -2); (ii) must be non-essential for a larger percentage of cell-lines in other cell-types (for example, it a gene is essential for 30% of AML cell-lines it must be non-essential for at least 70% of the other cell types);…
Gene_Ess	Percent_Ess_Sel	Percent_Ess_Rest	Expected_nCL	Observed_nCL	Enrichment
MED1	0.933333	0.264484	4.33252	14	3.23137
MYB	0.866667	0.0554156	1.27427	13	10.2019
CBFB	0.8	0.0856423	1.67476	12	7.16522
MED19	0.8	0.234257	3.82282	12	3.13905
RCCD1	0.8	0.261965	4.2233	12	2.84138
SPI1	0.733333	0.0151134	0.618932	11	17.7725
CPA6	0.733333	0.123426	2.18447	11	5.03556
ZEB2	0.733333	0.133501	2.3301	11	4.72083
MRGPRD	0.733333	0.13602	2.3665	11	4.64821
SMARCB1	0.733333	0.2267	3.67718	11	2.99142
BARHL1	0.733333	0.269521	4.29612	11	2.56045
CCM2	0.733333	0.350126	5.46117	11	2.01422
MED14	0.733333	0.400504	6.18932	11	1.77725
OPA1	0.666667	0.0629723	1.27427	10	7.84762
GALNT8	0.666667	0.0680101	1.34709	10	7.42342
RNF26	0.666667	0.0881612	1.63835	10	6.1037
C1orf116	0.666667	0.105793	1.8932	10	5.28205
DBX1	0.666667	0.108312	1.92961	10	5.18239
MSI2	0.666667	0.151134	2.54854	10	3.92381
PSMA7	0.666667	0.309824	4.84223	10	2.06516
HLA-DQA1	0.6	0.0453401	0.98301	9	9.15556
RAB15	0.6	0.0806045	1.49272	9	6.02927
MED9	0.6	0.103275	1.82039	9	4.944
CD68	0.6	0.105793	1.8568	9	4.84706
HAS3	0.6	0.120907	2.07524	9	4.33684
OR2G3	0.6	0.13602	2.29369	9	3.92381
CYTL1	0.6	0.156171	2.58495	9	3.48169
AFAP1L1	0.6	0.166247	2.73058	9	3.296
YME1L1	0.6	0.176322	2.87621	9	3.12911
STRN4	0.6	0.178841	2.91262	9	3.09
MAP3K8	0.6	0.198992	3.20388	9	2.80909
KDM1A	0.6	0.206549	3.31311	9	2.71648
PDIA2	0.6	0.219144	3.49515	9	2.575
NR2C2AP	0.6	0.229219	3.64078	9	2.472
SF3B4	0.6	0.256927	4.04126	9	2.22703
ACLY	0.6	0.277078	4.33252	9	2.07731
ZC3H18	0.6	0.347607	5.35194	9	1.68163
CD1C	0.533333	0.070529	1.31068	8	6.1037
MAP7D1	0.533333	0.0755668	1.3835	8	5.78246
TARDBP	0.533333	0.0982368	1.71117	8	4.67518
APBB1	0.533333	0.105793	1.82039	8	4.39467
NR2E3	0.533333	0.115869	1.96602	8	4.06914
KCNJ18	0.533333	0.146096	2.40291	8	3.32929
SPINK2	0.533333	0.151134	2.47573	8	3.23137
HDAC11	0.533333	0.153652	2.51214	8	3.18454
ADH7	0.533333	0.166247	2.69417	8	2.96937
SH2D1A	0.533333	0.173804	2.8034	8	2.85368
DHX38	0.533333	0.183879	2.94903	8	2.71276
DLST	0.533333	0.201511	3.20388	8	2.49697
ORC2	0.533333	0.214106	3.38592	8	2.36272
MCHR1	0.533333	0.221662	3.49515	8	2.28889
OGDH	0.533333	0.229219	3.60437	8	2.21953
DPF2	0.533333	0.24937	3.89563	8	2.05358
HNRNPL	0.533333	0.267003	4.15049	8	1.92749
ATP1A1	0.533333	0.27204	4.2233	8	1.89425
XRCC6	0.533333	0.299748	4.62379	8	1.73018
EEF2	0.533333	0.322418	4.95146	8	1.61569
NUP205	0.533333	0.322418	4.95146	8	1.61569
CSE1L	0.533333	0.350126	5.35194	8	1.49478
PSMC4	0.533333	0.375315	5.71602	8	1.39958
OR2L13	0.466667	0.0201511	0.546117	7	12.8178
NAAA	0.466667	0.0201511	0.546117	7	12.8178
CEBPA	0.466667	0.0201511	0.546117	7	12.8178
FLT3	0.466667	0.0302267	0.691748	7	10.1193
TFCP2L1	0.466667	0.0302267	0.691748	7	10.1193
CLINT1	0.466667	0.0428212	0.873786	7	8.01111
ZMIZ1	0.466667	0.0730479	1.31068	7	5.34074
CCND3	0.466667	0.0957179	1.63835	7	4.27259
TRIM35	0.466667	0.100756	1.71117	7	4.09078
HMGB1	0.466667	0.105793	1.78398	7	3.92381
MASP1	0.466667	0.110831	1.8568	7	3.76993
PSIP1	0.466667	0.125945	2.07524	7	3.3731
BACE1	0.466667	0.128463	2.11165	7	3.31494
ESD	0.466667	0.128463	2.11165	7	3.31494
SLC39A11	0.466667	0.130982	2.14806	7	3.25876
FRAT1	0.466667	0.130982	2.14806	7	3.25876
EZH2	0.466667	0.133501	2.18447	7	3.20444
SF3B2	0.466667	0.146096	2.3665	7	2.95795
CWC15	0.466667	0.151134	2.43932	7	2.86965
PABPC1	0.466667	0.151134	2.43932	7	2.86965
DSG4	0.466667	0.15869	2.54854	7	2.74667
NPTXR	0.466667	0.161209	2.58495	7	2.70798
PTPN11	0.466667	0.166247	2.65777	7	2.63379
TACR2	0.466667	0.178841	2.83981	7	2.46496
SUB1	0.466667	0.18136	2.87621	7	2.43376
CD72	0.466667	0.188917	2.98544	7	2.34472
TGM2	0.466667	0.193955	3.05825	7	2.28889
SATL1	0.466667	0.196474	3.09466	7	2.26196
CDK13	0.466667	0.20403	3.20388	7	2.18485
SRRT	0.466667	0.219144	3.42233	7	2.04539
TFIP11	0.466667	0.236776	3.67718	7	1.90363
RBBP4	0.466667	0.259446	4.00485	7	1.74788
WBP11	0.466667	0.264484	4.07767	7	1.71667
PSMD11	0.466667	0.269521	4.15049	7	1.68655
TAF1	0.466667	0.277078	4.25971	7	1.6433
ZFR	0.466667	0.279597	4.29612	7	1.62938
FARP1	0.466667	0.307305	4.6966	7	1.49044
PSMC2	0.466667	0.31738	4.84223	7	1.44561
PRPF18	0.466667	0.347607	5.27913	7	1.32598
C10orf2	0.4	0.0277078	0.618932	6	9.69412
LYL1	0.4	0.0327456	0.691748	6	8.67368
IRF8	0.4	0.0352645	0.728155	6	8.24
GNG13	0.4	0.0377834	0.764563	6	7.84762
TCF3	0.4	0.0428212	0.837379	6	7.16522
FOXI3	0.4	0.0428212	0.837379	6	7.16522
ZNF577	0.4	0.0453401	0.873786	6	6.86667
UBTF	0.4	0.0503778	0.946602	6	6.33846
SENP1	0.4	0.0503778	0.946602	6	6.33846
RFESD	0.4	0.0554156	1.01942	6	5.88571
POLD3	0.4	0.0579345	1.05583	6	5.68276
ZNF560	0.4	0.0579345	1.05583	6	5.68276
KDSR	0.4	0.0629723	1.12864	6	5.31613
AIM2	0.4	0.0654912	1.16505	6	5.15
EFCAB1	0.4	0.0654912	1.16505	6	5.15
MVD	0.4	0.0680101	1.20146	6	4.99394
NT5M	0.4	0.0730479	1.27427	6	4.70857
EHMT1	0.4	0.0780856	1.34709	6	4.45405
CELSR1	0.4	0.0806045	1.3835	6	4.33684
TXNDC9	0.4	0.0831234	1.4199	6	4.22564
SCIN	0.4	0.0856423	1.45631	6	4.12
PEX2	0.4	0.0881612	1.49272	6	4.01951
EPC2	0.4	0.0982368	1.63835	6	3.66222
MAP4K4	0.4	0.0982368	1.63835	6	3.66222
SOAT2	0.4	0.103275	1.71117	6	3.50638
RNF145	0.4	0.108312	1.78398	6	3.36327
INMT	0.4	0.11335	1.8568	6	3.23137
ANAPC2	0.4	0.11335	1.8568	6	3.23137
FKRP	0.4	0.115869	1.8932	6	3.16923
TOM1L2	0.4	0.118388	1.92961	6	3.10943
EFNB1	0.4	0.120907	1.96602	6	3.05185
ZNF562	0.4	0.120907	1.96602	6	3.05185
GPR52	0.4	0.123426	2.00243	6	2.99636
RAB39B	0.4	0.125945	2.03883	6	2.94286
ZNF569	0.4	0.141058	2.25728	6	2.65806
JAG1	0.4	0.141058	2.25728	6	2.65806
RANBP1	0.4	0.148615	2.3665	6	2.53538
CDC37	0.4	0.153652	2.43932	6	2.4597
CTSK	0.4	0.156171	2.47573	6	2.42353
APC	0.4	0.161209	2.54854	6	2.35429
ACTR6	0.4	0.161209	2.54854	6	2.35429
PRMT5	0.4	0.161209	2.54854	6	2.35429
MOCS2	0.4	0.163728	2.58495	6	2.32113
CAD	0.4	0.168766	2.65777	6	2.25753
CPSF4	0.4	0.178841	2.8034	6	2.14026
SAFB	0.4	0.183879	2.87621	6	2.08608
INCA1	0.4	0.191436	2.98544	6	2.00976
CDK6	0.4	0.206549	3.20388	6	1.87273
TAF5L	0.4	0.206549	3.20388	6	1.87273
EP300	0.4	0.209068	3.24029	6	1.85169
ARNT	0.4	0.221662	3.42233	6	1.75319
DGCR6	0.4	0.224181	3.45874	6	1.73474
RNPS1	0.4	0.2267	3.49515	6	1.71667
MTX1	0.4	0.231738	3.56796	6	1.68163
MAX	0.4	0.236776	3.64078	6	1.648
CBLL1	0.4	0.241814	3.71359	6	1.61569
POLR2F	0.4	0.244332	3.75	6	1.6
SNRPF	0.4	0.264484	4.04126	6	1.48468
TUBB	0.4	0.264484	4.04126	6	1.48468
POLR2C	0.4	0.264484	4.04126	6	1.48468
WNK1	0.4	0.264484	4.04126	6	1.48468
PPP2CA	0.4	0.292191	4.44175	6	1.35082
AP2S1	0.4	0.292191	4.44175	6	1.35082
COPA	0.4	0.302267	4.58738	6	1.30794
RPS3A	0.4	0.337531	5.09709	6	1.17714
PLK1	0.4	0.342569	5.1699	6	1.16056
MCM7	0.4	0.350126	5.27913	6	1.13655
TOMM40	0.4	0.360202	5.42476	6	1.10604
SMC1A	0.4	0.372796	5.6068	6	1.07013
DDAH2	0.333333	0.00503778	0.254854	5	19.619
FLI1	0.333333	0.0100756	0.32767	5	15.2593
SPIN2A	0.333333	0.0125945	0.364078	5	13.7333
SPIN2B	0.333333	0.0125945	0.364078	5	13.7333
MPG	0.333333	0.0125945	0.364078	5	13.7333
BARX1	0.333333	0.0151134	0.400485	5	12.4848
SLC38A2	0.333333	0.0176322	0.436893	5	11.4444
GPA33	0.333333	0.0201511	0.473301	5	10.5641
CEBPD	0.333333	0.02267	0.509709	5	9.80952
DDX52	0.333333	0.0277078	0.582524	5	8.58333
CAMK2N1	0.333333	0.0327456	0.65534	5	7.62963
RAB11FIP4	0.333333	0.0327456	0.65534	5	7.62963
MEF2D	0.333333	0.0352645	0.691748	5	7.22807
RAP2C	0.333333	0.0377834	0.728155	5	6.86667
GPR142	0.333333	0.0403023	0.764563	5	6.53968
IRF2BP2	0.333333	0.0428212	0.800971	5	6.24242
GJB4	0.333333	0.0428212	0.800971	5	6.24242
RBMS1	0.333333	0.0428212	0.800971	5	6.24242
GAA	0.333333	0.0453401	0.837379	5	5.97101
BNIP1	0.333333	0.0478589	0.873786	5	5.72222
CETP	0.333333	0.0503778	0.910194	5	5.49333
DDAH1	0.333333	0.0503778	0.910194	5	5.49333
SDE2	0.333333	0.0503778	0.910194	5	5.49333
RAB5C	0.333333	0.0528967	0.946602	5	5.28205
EDIL3	0.333333	0.0528967	0.946602	5	5.28205
RPP21	0.333333	0.0554156	0.98301	5	5.08642
PNRC2	0.333333	0.0554156	0.98301	5	5.08642
KAT2B	0.333333	0.0554156	0.98301	5	5.08642
OR7G2	0.333333	0.0629723	1.09223	5	4.57778
UHMK1	0.333333	0.0629723	1.09223	5	4.57778
BHLHE41	0.333333	0.0654912	1.12864	5	4.43011
HK3	0.333333	0.0654912	1.12864	5	4.43011
UBE2Q1	0.333333	0.0654912	1.12864	5	4.43011
TAB3	0.333333	0.070529	1.20146	5	4.16162
SEMA5A	0.333333	0.070529	1.20146	5	4.16162
CSTF3	0.333333	0.070529	1.20146	5	4.16162
UBN1	0.333333	0.0730479	1.23786	5	4.03922
ABR	0.333333	0.0730479	1.23786	5	4.03922
KDELR2	0.333333	0.0755668	1.27427	5	3.92381
PLA2G6	0.333333	0.0755668	1.27427	5	3.92381
SEC22C	0.333333	0.0780856	1.31068	5	3.81481
HES3	0.333333	0.0806045	1.34709	5	3.71171
NCLN	0.333333	0.0831234	1.3835	5	3.61404
PRKAR1B	0.333333	0.0856423	1.4199	5	3.52137
XBP1	0.333333	0.0856423	1.4199	5	3.52137
JAK2	0.333333	0.0856423	1.4199	5	3.52137
RHOXF2	0.333333	0.0906801	1.49272	5	3.34959
RHOXF2B	0.333333	0.0906801	1.49272	5	3.34959
DDX5	0.333333	0.0957179	1.56553	5	3.1938
BIRC8	0.333333	0.0957179	1.56553	5	3.1938
CIRBP	0.333333	0.0957179	1.56553	5	3.1938
NELFE	0.333333	0.0982368	1.60194	5	3.12121
CRYBB2	0.333333	0.0982368	1.60194	5	3.12121
IL12RB1	0.333333	0.0982368	1.60194	5	3.12121
DNAJA2	0.333333	0.100756	1.63835	5	3.05185
MYL10	0.333333	0.110831	1.78398	5	2.80272
BCOR	0.333333	0.11335	1.82039	5	2.74667
MED24	0.333333	0.11335	1.82039	5	2.74667
IMPACT	0.333333	0.120907	1.92961	5	2.59119
GJD2	0.333333	0.120907	1.92961	5	2.59119
ADTRP	0.333333	0.123426	1.96602	5	2.54321
TMEM86B	0.333333	0.125945	2.00243	5	2.49697
INHA	0.333333	0.128463	2.03883	5	2.45238
WDR90	0.333333	0.133501	2.11165	5	2.36782
TAF3	0.333333	0.13602	2.14806	5	2.32768
CMC2	0.333333	0.13602	2.14806	5	2.32768
ACSM2A	0.333333	0.138539	2.18447	5	2.28889
CCR7	0.333333	0.143577	2.25728	5	2.21505
HMGA2	0.333333	0.146096	2.29369	5	2.17989
LDHAL6A	0.333333	0.151134	2.3665	5	2.11282
CLPP	0.333333	0.151134	2.3665	5	2.11282
MAPK1	0.333333	0.156171	2.43932	5	2.04975
ZNF177	0.333333	0.156171	2.43932	5	2.04975
ZNF559-ZNF177	0.333333	0.156171	2.43932	5	2.04975
ACOT13	0.333333	0.156171	2.43932	5	2.04975
BRD2	0.333333	0.15869	2.47573	5	2.01961
TFDP1	0.333333	0.161209	2.51214	5	1.99034
GPX4	0.333333	0.163728	2.54854	5	1.9619
FBXW11	0.333333	0.166247	2.58495	5	1.93427
BPTF	0.333333	0.166247	2.58495	5	1.93427
RING1	0.333333	0.168766	2.62136	5	1.90741
DEFA5	0.333333	0.168766	2.62136	5	1.90741
SEC61G	0.333333	0.173804	2.69417	5	1.85586
RPN1	0.333333	0.173804	2.69417	5	1.85586
KLRF1	0.333333	0.173804	2.69417	5	1.85586
MDM4	0.333333	0.176322	2.73058	5	1.83111
MED8	0.333333	0.188917	2.91262	5	1.71667
PRPF3	0.333333	0.191436	2.94903	5	1.69547
CHAF1A	0.333333	0.191436	2.94903	5	1.69547
CDH8	0.333333	0.191436	2.94903	5	1.69547
MYD88	0.333333	0.193955	2.98544	5	1.6748
RRM2	0.333333	0.193955	2.98544	5	1.6748
PRPF38B	0.333333	0.206549	3.16748	5	1.57854
NUP155	0.333333	0.209068	3.20388	5	1.56061
B4GALT4	0.333333	0.209068	3.20388	5	1.56061
ACTL6A	0.333333	0.211587	3.24029	5	1.54307
SNRPD2	0.333333	0.219144	3.34951	5	1.49275
GATA6	0.333333	0.219144	3.34951	5	1.49275
RPS25	0.333333	0.219144	3.34951	5	1.49275
EIF6	0.333333	0.236776	3.60437	5	1.38721
USP5	0.333333	0.244332	3.71359	5	1.34641
CTNNBL1	0.333333	0.246851	3.75	5	1.33333
FLNA	0.333333	0.24937	3.78641	5	1.32051
SF3A1	0.333333	0.251889	3.82282	5	1.30794
MYBBP1A	0.333333	0.261965	3.96845	5	1.25994
SERPINH1	0.333333	0.261965	3.96845	5	1.25994
UBR5	0.333333	0.269521	4.07767	5	1.22619
TYMS	0.333333	0.27204	4.11408	5	1.21534
CIRH1A	0.333333	0.279597	4.2233	5	1.18391
SRSF2	0.333333	0.297229	4.47816	5	1.11653
PLRG1	0.333333	0.309824	4.66019	5	1.07292
CLTC	0.333333	0.309824	4.66019	5	1.07292
SUZ12	0.333333	0.31738	4.76942	5	1.04835
KRR1	0.333333	0.322418	4.84223	5	1.03258
MED12	0.333333	0.327456	4.91505	5	1.01728
PRSS27	0.266667	0.00503778	0.218447	4	18.3111
SLC35E4	0.266667	0.0100756	0.291262	4	13.7333
TP53RK	0.266667	0.0100756	0.291262	4	13.7333
RASGRP3	0.266667	0.0100756	0.291262	4	13.7333
PNLIPRP1	0.266667	0.0100756	0.291262	4	13.7333
SEMA3F	0.266667	0.0125945	0.32767	4	12.2074
MARCH5	0.266667	0.0125945	0.32767	4	12.2074
PPIG	0.266667	0.0125945	0.32767	4	12.2074
ADAM12	0.266667	0.0125945	0.32767	4	12.2074
S100A8	0.266667	0.0125945	0.32767	4	12.2074
GPM6B	0.266667	0.0151134	0.364078	4	10.9867
BIRC3	0.266667	0.0176322	0.400485	4	9.98788
UBE2J2	0.266667	0.0176322	0.400485	4	9.98788
CSF2RB	0.266667	0.0201511	0.436893	4	9.15556
RNF130	0.266667	0.0201511	0.436893	4	9.15556
OTUD7A	0.266667	0.02267	0.473301	4	8.45128
GLRA2	0.266667	0.0251889	0.509709	4	7.84762
DKK2	0.266667	0.0251889	0.509709	4	7.84762
STEAP3	0.266667	0.0251889	0.509709	4	7.84762
MEF2B	0.266667	0.0251889	0.509709	4	7.84762
STK38	0.266667	0.0277078	0.546117	4	7.32444
ADAMTS17	0.266667	0.0277078	0.546117	4	7.32444
EXT2	0.266667	0.0277078	0.546117	4	7.32444
KCNB1	0.266667	0.0277078	0.546117	4	7.32444
TOM1	0.266667	0.0302267	0.582524	4	6.86667
LATS1	0.266667	0.0302267	0.582524	4	6.86667
CABP2	0.266667	0.0302267	0.582524	4	6.86667
OPTN	0.266667	0.0302267	0.582524	4	6.86667
TLE3	0.266667	0.0327456	0.618932	4	6.46275
ZNF169	0.266667	0.0327456	0.618932	4	6.46275
CRABP1	0.266667	0.0327456	0.618932	4	6.46275
CACNA2D2	0.266667	0.0352645	0.65534	4	6.1037
PKIA	0.266667	0.0352645	0.65534	4	6.1037
PDCD6	0.266667	0.0377834	0.691748	4	5.78246
PRDX6	0.266667	0.0377834	0.691748	4	5.78246
RNF182	0.266667	0.0377834	0.691748	4	5.78246
CABP7	0.266667	0.0377834	0.691748	4	5.78246
CARM1	0.266667	0.0377834	0.691748	4	5.78246
HRK	0.266667	0.0428212	0.764563	4	5.23175
DGCR2	0.266667	0.0428212	0.764563	4	5.23175
ZNF771	0.266667	0.0428212	0.764563	4	5.23175
ISL1	0.266667	0.0428212	0.764563	4	5.23175
MLXIP	0.266667	0.0428212	0.764563	4	5.23175
AVP	0.266667	0.0453401	0.800971	4	4.99394
HNRNPH3	0.266667	0.0453401	0.800971	4	4.99394
MST1L	0.266667	0.0453401	0.800971	4	4.99394
SLC2A3	0.266667	0.0478589	0.837379	4	4.77681
FURIN	0.266667	0.0478589	0.837379	4	4.77681
CABYR	0.266667	0.0478589	0.837379	4	4.77681
ATP5S	0.266667	0.0478589	0.837379	4	4.77681
EPHX3	0.266667	0.0478589	0.837379	4	4.77681
AFF1	0.266667	0.0503778	0.873786	4	4.57778
NRAS	0.266667	0.0528967	0.910194	4	4.39467
FOXA3	0.266667	0.0528967	0.910194	4	4.39467
PSME1	0.266667	0.0528967	0.910194	4	4.39467
FOLR3	0.266667	0.0579345	0.98301	4	4.06914
SNAI1	0.266667	0.0579345	0.98301	4	4.06914
REN	0.266667	0.0579345	0.98301	4	4.06914
AMFR	0.266667	0.0604534	1.01942	4	3.92381
ZBED1	0.266667	0.0604534	1.01942	4	3.92381
SLC4A4	0.266667	0.0604534	1.01942	4	3.92381
APEX2	0.266667	0.0629723	1.05583	4	3.78851
LMX1B	0.266667	0.0629723	1.05583	4	3.78851
LAMP1	0.266667	0.0629723	1.05583	4	3.78851
KCNA4	0.266667	0.0629723	1.05583	4	3.78851
S100A1	0.266667	0.0629723	1.05583	4	3.78851
DGKI	0.266667	0.0654912	1.09223	4	3.66222
RORA	0.266667	0.0654912	1.09223	4	3.66222
NACAD	0.266667	0.0680101	1.12864	4	3.54409
B3GALT5	0.266667	0.070529	1.16505	4	3.43333
UGT2B7	0.266667	0.0730479	1.20146	4	3.32929
SLC3A1	0.266667	0.0730479	1.20146	4	3.32929
UBE3A	0.266667	0.0730479	1.20146	4	3.32929
CD180	0.266667	0.0755668	1.23786	4	3.23137
ZNF561	0.266667	0.0755668	1.23786	4	3.23137
LAYN	0.266667	0.0755668	1.23786	4	3.23137
KCNH3	0.266667	0.0755668	1.23786	4	3.23137
EBF1	0.266667	0.0755668	1.23786	4	3.23137
ARHGEF15	0.266667	0.0780856	1.27427	4	3.13905
CCND2	0.266667	0.0780856	1.27427	4	3.13905
GPSM3	0.266667	0.0806045	1.31068	4	3.05185
FBXL21	0.266667	0.0806045	1.31068	4	3.05185
MTHFD1	0.266667	0.0806045	1.31068	4	3.05185
IL23A	0.266667	0.0831234	1.34709	4	2.96937
PDPN	0.266667	0.0856423	1.3835	4	2.89123
PDS5B	0.266667	0.0856423	1.3835	4	2.89123
GOT2	0.266667	0.0856423	1.3835	4	2.89123
TPM3	0.266667	0.0881612	1.4199	4	2.81709
HFE	0.266667	0.0881612	1.4199	4	2.81709
CYBA	0.266667	0.0906801	1.45631	4	2.74667
OXER1	0.266667	0.0906801	1.45631	4	2.74667
ACY1	0.266667	0.0906801	1.45631	4	2.74667
DYRK1A	0.266667	0.0957179	1.52913	4	2.61587
ATF5	0.266667	0.0957179	1.52913	4	2.61587
KAT7	0.266667	0.0982368	1.56553	4	2.55504
SELENBP1	0.266667	0.100756	1.60194	4	2.49697
PFAS	0.266667	0.100756	1.60194	4	2.49697
WNT9B	0.266667	0.100756	1.60194	4	2.49697
PRSS21	0.266667	0.103275	1.63835	4	2.44148
GABARAP	0.266667	0.103275	1.63835	4	2.44148
SP1	0.266667	0.103275	1.63835	4	2.44148
ELL2	0.266667	0.103275	1.63835	4	2.44148
TMPRSS3	0.266667	0.105793	1.67476	4	2.38841
PANK2	0.266667	0.108312	1.71117	4	2.33759
VLDLR	0.266667	0.108312	1.71117	4	2.33759
FGF18	0.266667	0.110831	1.74757	4	2.28889
FOXK1	0.266667	0.110831	1.74757	4	2.28889
OAZ2	0.266667	0.11335	1.78398	4	2.24218
BIRC5	0.266667	0.11335	1.78398	4	2.24218
ITPR3	0.266667	0.115869	1.82039	4	2.19733
RGL1	0.266667	0.118388	1.8568	4	2.15425
SRSF10	0.266667	0.118388	1.8568	4	2.15425
BLNK	0.266667	0.123426	1.92961	4	2.07296
ZNF266	0.266667	0.123426	1.92961	4	2.07296
ATP6V1E1	0.266667	0.125945	1.96602	4	2.03457
PNN	0.266667	0.125945	1.96602	4	2.03457
CACNA1C	0.266667	0.128463	2.00243	4	1.99758
RABGAP1	0.266667	0.141058	2.18447	4	1.83111
KLF2	0.266667	0.143577	2.22087	4	1.80109
RBM17	0.266667	0.15869	2.43932	4	1.6398
ATP6V1E2	0.266667	0.15869	2.43932	4	1.6398
ATP6V1G3	0.266667	0.163728	2.51214	4	1.59227
PER3	0.266667	0.163728	2.51214	4	1.59227
RHEBL1	0.266667	0.163728	2.51214	4	1.59227
HOXD10	0.266667	0.166247	2.54854	4	1.56952
LSM5	0.266667	0.168766	2.58495	4	1.54742
CDC20	0.266667	0.171285	2.62136	4	1.52593
SGOL1	0.266667	0.171285	2.62136	4	1.52593
SIRPD	0.266667	0.173804	2.65777	4	1.50502
TAF6L	0.266667	0.173804	2.65777	4	1.50502
CAND1	0.266667	0.18136	2.76699	4	1.44561
RGS10	0.266667	0.18136	2.76699	4	1.44561
PPIL2	0.266667	0.183879	2.8034	4	1.42684
PPP4C	0.266667	0.183879	2.8034	4	1.42684
CDK2	0.266667	0.186398	2.83981	4	1.40855
LSM2	0.266667	0.191436	2.91262	4	1.37333
LEO1	0.266667	0.191436	2.91262	4	1.37333
HSD17B10	0.266667	0.193955	2.94903	4	1.35638
USP9X	0.266667	0.196474	2.98544	4	1.33984
THOC3	0.266667	0.196474	2.98544	4	1.33984
FGF13	0.266667	0.201511	3.05825	4	1.30794
EIF4G1	0.266667	0.20403	3.09466	4	1.29255
RNF40	0.266667	0.20403	3.09466	4	1.29255
NFRKB	0.266667	0.206549	3.13107	4	1.27752
SOD2	0.266667	0.211587	3.20388	4	1.24848
SYT13	0.266667	0.216625	3.2767	4	1.22074
ATP5C1	0.266667	0.224181	3.38592	4	1.18136
CARS	0.266667	0.2267	3.42233	4	1.16879
MASTL	0.266667	0.231738	3.49515	4	1.14444
AURKB	0.266667	0.236776	3.56796	4	1.12109
EIF5A	0.266667	0.236776	3.56796	4	1.12109
SIN3A	0.266667	0.239295	3.60437	4	1.10976
GAK	0.266667	0.241814	3.64078	4	1.09867
EIF4A3	0.266667	0.24937	3.75	4	1.06667
SMU1	0.266667	0.251889	3.78641	4	1.05641
SNW1	0.266667	0.254408	3.82282	4	1.04635
ARID1A	0.266667	0.254408	3.82282	4	1.04635
CYB561	0.266667	0.261965	3.93204	4	1.01728
TFRC	0.266667	0.261965	3.93204	4	1.01728
RANBP2	0.266667	0.264484	3.96845	4	1.00795

## Sheet: Supp_Table_S3_Top pairs AML HUG
Supplementary Table 3. Complete ranking of lethal dependencies in AML using the HUGE-based statistical approach. The Increment of Essentiality (deltaEs) column represents the average variation in the DEMETER score between altered and wild-type cells, and its sign is related to the lethal dependy relationship.
Gene_E	Mutation	deltaEs	t	P.Value	lfdr	nDeath_Target	Ess_Target	Ess_NoTarget	RestCL_deltaEs	RestCL_t	RestCL_P.Value	Same_Dir	String	Triade	Driver	nMut	nTargettable	pDeathTot	pDeathTarget	ensembl_gene_id	gene_biotype	transcript_length	Loc	Cancer	Drug	Indication	Function	Metabolic	molCIMA
NRAS	NRAS	-6.83	-8.71441	4.66973e-08	0.000137795	4	-6.55895	0.272478	-2.95906	-10.9383	1.5516e-24	1	1	1	1	4	4	26.67	100	ENSG00000213281	protein_coding	4449	Golgi apparatus, plasma membrane	oncogene, NA				0	0
FLT3	FLT3	-6.36	-4.52811	0.000228048	0.200218	4	-6.43022	-0.0657606	0.0568904	0.19656	0.844272	0	1	1	1	4	4	26.67	100	ENSG00000122025	protein_coding	3842	cytoplasm, nucleus, plasma membrane	oncogene, NA	Plx-3397, Amuvatinib, Cm-082, Akn-028, Pacritinib, Fedratinib, Cep-2563, Gilteritinib, Ponatinib, Crenolanib, Sorafenib, Su-14813, Lestaurtinib, Rg-1530, Sunitinib, C-1311, Sorafenib, Foretinib, Tandutinib, Tg-02, Su-014813, Ast-487, 4sc-203, Kw-2449, Quizartinib, Midostaurin, Ct-1578, Linifanib, Enmd-981693, Dovitinib, Famitinib, Sunitinib, As-602868, Enmd-2076, At-9283, Xl-999	PROSTATIC NEOPLASMS, GASTROINTESTINAL STROMAL TUMORS, MELANOMA, ARTHRITIS, RHEUMATOID, GLIOBLASTOMA, LEUKEMIA, MYELOID, ACUTE, HODGKIN DISEASE, SMALL CELL LUNG CARCINOMA, NEOPLASMS, MACULAR DEGENERATION, LEUKEMIA, MYELOID, ACUTE, LEUKEMIA, PRIMARY MYELOFIBROSIS, COLORECTAL NEOPLASMS, NEOPLASMS, LIVER DISEASES, PRIMARY MYELOFIBROSIS, NA, LEUKEMIA, MYELOID, ACUTE, NEOPLASMS, LIVER DISEASES, NA, LEU…	Inhibitor	0	0
KLF2	EP300	3.69	4.07687	0.000638073	0.212255	4	-1.9419	1.74945	-0.311181	-1.61391	0.107338	0	1	1	0	4	11	26.67	36.36	ENSG00000127528	protein_coding	9587	nucleus					0	0
PLK1	EP300	-8.11	-4.03563	0.00070121	0.217387	4	-4.45422	3.65197	-0.612395	-1.38831	0.165815	1	1	1	0	4	4	26.67	100	ENSG00000166851	protein_coding	9587	cytoplasm, nucleus		Volasertib, Tak-960, Nms-1286937, Hmn-214, Cafusertib, Mk-1496, Bi-2536, Gsk-461364	LEUKEMIA, MYELOID, ACUTE, LEUKEMIA, NEOPLASMS, MYELODYSPLASTIC SYNDROMES, OVARIAN NEOPLASMS, NEOPLASMS, NEOPLASMS, NA, LEUKEMIA, MYELOID, ACUTE, NEOPLASMS, NEOPLASMS, NEOPLASMS, LYMPHOMA, NON-HODGKIN	Inhibitor	0	0
UBR5	CLTCL1	-6.66	-3.58512	0.00199465	0.219663	5	-1.22969	5.43526	-0.422573	-0.846667	0.397688	1	1	1	0	12	12	33.33	41.67	ENSG00000104517	protein_coding	5513	cytoplasm, nucleus	Unknown, NA				0	0
SNRPF	TGS1	-7.87	-4.05161	0.000668918	0.335812	3	-7.65222	0.220548	0.516204	0.636885	0.524565	0	1	0	0	3	3	20	100	ENSG00000139343	protein_coding	3782						0	0
ZNF266	EPHB6	2.53	2.76901	0.0121987	0.342168	4	-0.452067	2.07585	-0.142579	-0.577524	0.563911	0	1	1	0	3	12	26.67	33.33	ENSG00000174652	protein_coding	4409	nucleus					0	0
CDK6	PIK3C2G	3.35	2.9519	0.00819539	0.351313	4	-3.58456	-0.238544	-0.032372	-0.121332	0.903489	0	1	1	0	10	5	26.67	80	ENSG00000105810	protein_coding	4963	cytoplasm, nucleus	oncogene, NA	Abemaciclib, Palbociclib, G1t28-1, Ribociclib, (7s)-Hydroxyl-Staurosporine, Palbociclib, Ribociclib, Alvocidib	LIPOSARCOMA, LYMPHOMA, NEOPLASMS, BREAST NEOPLASMS, LYMPHOMA, MANTLE-CELL, CARCINOMA, NON-SMALL-CELL LUNG, NA, NA, LYMPHOMA, LIPOSARCOMA, CARCINOMA, HEPATOCELLULAR, LIVER DISEASES, BREAST NEOPLASMS, NEOPLASMS, CARCINOMA, SQUAMOUS CELL, MELANOMA, GLIOBLASTOMA, MELANOMA, LIPOSARCOMA, BREAST NEOPLASMS, LYMPHOMA, LYMPHOMA, MANTLE-CELL, NEOPLASMS, PROSTATIC NEOPLASMS, CARCINOMA, HEPATOCELLULAR, CARCIN…	Inhibitor	0	1
ARID1A	EP300	2.8	2.62274	0.0167134	0.407922	4	-1.22058	1.58428	0.170276	0.603764	0.546343	1	1	1	0	4	11	26.67	36.36	ENSG00000117713	protein_coding	9587	nucleus	suppressor, NA				0	0
CDK2	CDK14	-3.95	-2.74503	0.012791	0.429575	2	-3.45385	0.494438	-0.378103	-0.470935	0.637945	1	1	1	0	3	3	13.33	66.67	ENSG00000123374	protein_coding	5163	cytoplasm, nucleus		Indirubin-3'-Monoxime, SU9516, Bms-387032, Bosutinib, Alvocidib, Tg-02, (7s)-Hydroxyl-Staurosporine, Dinaciclib, Hymenialdisine, Seliciclib, Indirubin Sulfate, Rg-547, Olomoucine, Flavopiridol, Rgb-286638, Ag-24322, Milciclib	NA, NA, NA, NA, LEUKEMIA, LYMPHOCYTIC, CHRONIC, B-CELL, PROSTATIC NEOPLASMS, NEOPLASMS, LYMPHOMA, MULTIPLE MYELOMA, HEMATOLOGIC NEOPLASMS, LEUKEMIA, LYMPHOCYTIC, CHRONIC, B-CELL, MELANOMA, MELANOMA, MULTIPLE MYELOMA, LEUKEMIA, LYMPHOCYTIC, CHRONIC, B-CELL, NA, CARCINOMA, NON-SMALL-CELL LUNG, CYSTIC FIBROSIS, NA, NEOPLASMS, NA, NA, NA, NA, CARCINOMA	Inhibitor	0	0
SMARCB1	CDK14	-1.23	-2.69795	0.0141658	0.436554	3	-3.89987	-2.67054	-0.308353	-0.389818	0.696879	1	1	1	0	3	3	20	100	ENSG00000099956	protein_coding	5163	nucleus	suppressor, NA				0	0
TFDP1	EP300	2.15	2.43339	0.0249573	0.455425	5	-1.42418	0.72234	-0.337777	-1.51815	0.129767	0	1	1	0	4	11	33.33	45.45	ENSG00000198176	protein_coding	9587	nucleus	oncogene, NA				0	0
LATS1	CDK14	-1.51	-2.33013	0.0308513	0.482573	3	-2.64103	-1.1269	-0.15184	-0.429534	0.667766	1	1	1	0	3	3	20	100	ENSG00000131023	protein_coding	5163						0	0
EP300	NCOA3	3.04	2.75431	0.0125446	0.494155	5	-3.76123	-0.719897	0.165344	0.591852	0.554284	1	1	1	0	7	8	33.33	62.5	ENSG00000100393	protein_coding	7939	cytoplasm, nucleus	suppressor, NA				0	0
TAF1	EP300	-5.26	-2.28438	0.0339713	0.498256	3	-5.2102	0.0515275	-0.786934	-2.14049	0.0329206	1	1	1	0	4	4	20	75	ENSG00000147133	protein_coding	9587		oncogene, NA				0	0
CCND2	CDK14	2.97	2.21818	0.0387912	0.49886	4	-0.813775	2.1523	0.0160427	0.0389946	0.968914	1	1	1	0	3	12	26.67	33.33	ENSG00000118971	protein_coding	5163	nucleus	oncogene, NA				0	0
ACTL6A	AURKC	-3.26	-3.89272	0.000955468	0.499259	4	-3.77787	-0.517881	-0.336112	-1.29566	0.195841	1	1	0	0	4	4	26.67	100	ENSG00000136518	protein_coding	1610	nucleus, plasma membrane					0	0
TOM1L2	ZFYVE9	2.14	2.35312	0.0295644	0.511906	6	-2.16273	-0.0243513	-0.418085	-0.939062	0.348266	0	1	1	0	3	12	40	50	ENSG00000175662	protein_coding	5194						0	0
ARNT	NCOA3	5.64	2.54076	0.0198557	0.519413	5	-3.33541	2.30757	-0.0434717	-0.125003	0.900584	0	1	1	0	7	8	33.33	62.5	ENSG00000143437	protein_coding	7939	cytoplasm, nucleus	oncogene, NA				0	0
BPTF	EP300	2.03	2.21074	0.039461	0.520839	4	-1.79454	0.239961	-0.182676	-0.784142	0.433422	0	1	1	0	4	11	26.67	36.36	ENSG00000171634	protein_coding	9587	cytoplasm, nucleus					0	0
MYBBP1A	EP300	-2.32	-2.203	0.0400831	0.523257	3	-2.39326	-0.0751484	-0.711624	-2.46136	0.0142628	1	1	1	0	4	4	20	75	ENSG00000132382	protein_coding	9587	cytoplasm, nucleus					0	0
SNRPF	MAP3K1	-4	-3.05814	0.00652276	0.533418	6	-2.12213	1.87779	-0.981423	-2.37852	0.0178519	1	1	1	0	11	11	40	54.55	ENSG00000139343	protein_coding	7011						0	0
MYD88	EP300	-2.77	-2.11611	0.0477051	0.550851	3	-2.62023	0.148693	-0.303734	-1.25118	0.211602	1	1	1	0	4	4	20	75	ENSG00000172936	protein_coding	9587	cytoplasm, plasma membrane	oncogene, NA				0	0
PTPN11	FLT3	-3.5	-2.62949	0.0164771	0.576944	4	-3.78044	-0.277481	0.881099	1.75028	0.0808381	0	1	1	0	4	4	26.67	100	ENSG00000179295	protein_coding	3842	cytoplasm, mitochondrion, nucleus	oncogene, NA				0	0
PTPN11	NRAS	4.17	2.1985	0.0405286	0.588514	7	-3.51643	0.656566	1.62849	3.76168	0.000194034	1	1	1	0	4	11	46.67	63.64	ENSG00000179295	protein_coding	4449	cytoplasm, mitochondrion, nucleus	oncogene, NA				0	0
EEF2	NPM1	3.81	3.34052	0.00339357	0.59572	8	-2.47783	1.3272	-0.210571	-0.594761	0.55234	0	1	1	0	3	12	53.33	66.67	ENSG00000167658	protein_coding	1758	cytoplasm, nucleus, plasma membrane		Denileukin Diftitox	LYMPHOMA, T-CELL, PERIPHERAL, LYMPHOMA, BREAST NEOPLASMS, MALE, GRAFT VS HOST DISEASE, NEOPLASMS, MULTIPLE MYELOMA, LEUKEMIA, BIPHENOTYPIC, ACUTE, MELANOMA, PANCREATIC NEOPLASMS, OVARIAN NEOPLASMS	Inhibitor	0	0

## Sheet: Supp_Table_S4_CLs_Included
Supplementary Table 4. Cell lines included in the analysis.
Cell Line	Gender	Primary Site	Subtype
22RV1	M	prostate	Carcinoma
2313287	M	stomach	Adenocarcinoma
697	M	leukemia	B acute lymphoblastic leukemia
769P	F	kidney	Renal cell carcinoma - Clear cells
786O	M	kidney	Renal cell carcinoma - Clear cells
A172	M	central_nervous_system	Glioma-Astrocytoma Grade IV - Glioblastoma
A204	F	soft_tissue	Embryonal rhabdomyosarcoma
A2058	M	skin	Amelanotic melanoma
A375	F	skin	Amelanotic melanoma
A3KAW	F	leukemia	Diffuse large B cell lymphoma
A4FUK	F	leukemia	Diffuse large B cell lymphoma
A549	M	lung	NSCLC-Adenocarcinoma
A673	F	bone	Ewing sarcoma
A704	M	kidney	Renal cell carcinoma
ABC1	M	lung	NSCLC-Adenocarcinoma
ACHN	M	kidney	Renal cell carcinoma
AGS	F	stomach	Adenocarcinoma
AM38	M	central_nervous_system	Glioma-Astrocytoma Grade IV - Glioblastoma
AML193	F	leukemia	Acute Myelogenous LeukemiaÂ
AMO1	F	leukemia	Plasma cell myeloma
ASPC1	F	pancreas	Ductal Adenocarcinoma
AU565	F	breast	Breast adenocarcinoma
BFTC909	M	kidney	Renal cell carcinoma
BHY	M	upper_aerodigestive_tract	Squamous cell carcinoma - Head and neck
BICR22	M	upper_aerodigestive_tract	Squamous cell carcinoma - Tongue
BICR56	F	upper_aerodigestive_tract	Squamous cell carcinoma - Tongue
BICR6	M	upper_aerodigestive_tract	Squamous cell carcinoma - Hypopharynx
BT20	F	breast	Breast adenocarcinoma-Invasive Ductal Carcinoma
BT474	F	breast	Breast adenocarcinoma-Invasive Ductal Carcinoma
BXPC3	F	pancreas	Ductal Adenocarcinoma
C2BBE1	M	large_intestine	Colon Adenocarcinoma
C32	M	skin	Amelanotic melanoma
CADOES1	F	bone	Ewing sarcoma
CAKI2	M	kidney	Renal cell carcinoma - Papillary
CAL120	F	breast	Breast adenocarcinoma
CAL12T	M	lung	NSCLC-Adenocarcinoma
CAL27	M	upper_aerodigestive_tract	Squamous cell carcinoma - Tongue
CAL33	M	upper_aerodigestive_tract	Squamous cell carcinoma - Tongue
CAL51	F	breast	Breast adenocarcinoma
CAL54	M	kidney	Renal cell carcinoma
CALU1	M	lung	NSCLC-Squamous
CALU3	M	lung	NSCLC-Adenocarcinoma
CALU6	F	lung	NSCLC-Adenocarcinoma
CAOV3	F	ovary	Adenocarcinoma - High grade serous
CAOV4	F	ovary	Adenocarcinoma - High grade serous
CAS1	M	central_nervous_system	Glioma-Astrocytoma Grade IV - Glioblastoma
CFPAC1	M	pancreas	Ductal Adenocarcinoma
CHAGOK1	M	lung	Other & Not specified
CJM		skin	Melanoma
COLO679	F	skin	Melanoma
COLO680N	F	oesophagus	Squamous cell carcinoma
COLO684	F	endometrium	Endometrial adenocarcinoma
COLO741	F	skin	Melanoma
COLO783	F	skin	Melanoma
COLO800		skin	Melanoma
COLO829	M	skin	Melanoma
CORL105	M	lung	NSCLC-Adenocarcinoma
CORL23	M	lung	NSCLC-Large Cell carcinoma
CORL279	M	lung	SCLC
CORL88	M	lung	SCLC
COV362	F	ovary	Adenocarcinoma - High grade serous
COV434	F	ovary	Endometrioid carcinoma - Granulosa cell
COV644	F	ovary	Adenocarcinoma - Mucinous
D283MED	M	central_nervous_system	Medulloblastoma
D341MED	M	central_nervous_system	Medulloblastoma
DB	M	leukemia	Diffuse large B cell lymphoma
DBTRG05MG	F	central_nervous_system	Glioma-Astrocytoma Grade IV - Glioblastoma
DKMG	F	central_nervous_system	Glioma-Astrocytoma Grade IV - Glioblastoma
DMS114	M	lung	SCLC
DMS273	F	lung	SCLC
DMS53	M	lung	SCLC
DND41	M	leukemia	Acute Lymphoblastic T cell leukemia
DU145	M	prostate	Carcinoma
EBC1	M	lung	NSCLC-Squamous
ECC10		stomach	Adenocarcinoma - Small Cell
ECGI10		oesophagus	Squamous cell carcinoma
EFE184	F	endometrium	Endometrial carcinoma
EFM19	F	breast	Breast adenocarcinoma-Invasive Ductal Carcinoma
EFO21	F	ovary	Adenocarcinoma - Clear cell
EFO27	F	ovary	Adenocarcinoma - Mucinous
EN	F	endometrium	Endometrial carcinoma
EPLC272H	M	lung	NSCLC-Squamous
ES2	F	ovary	Adenocarcinoma - Clear cell
ESS1	F	endometrium	Endometrioid stromal sarcomaÂ
F36P	M	leukemia	Acute Myelogenous LeukemiaÂ
FADU	M	upper_aerodigestive_tract	Squamous cell carcinoma - Hypopharynx
FU97	F	stomach	Adenocarcinoma
G361	M	skin	Melanoma
G401	M	soft_tissue	Rhabdoid tumor of the kidney
G402	F	soft_tissue	Epithelioid cell type gastrointestinal stromal tumor
GB1	M	central_nervous_system	Glioma-Astrocytoma Grade IV - Glioblastoma
GP2D	F	large_intestine	Colon Adenocarcinoma
GSS		stomach	Carcinoma
GSU		stomach	Carcinoma
HCC1143	F	breast	Breast adenocarcinoma-Invasive Ductal Carcinoma
HCC1187	F	breast	Breast adenocarcinoma-Invasive Ductal Carcinoma
HCC1359	F	lung	NSCLC-Large Cell carcinoma
HCC1395	F	breast	Breast adenocarcinoma-Invasive Ductal Carcinoma
HCC1428	F	breast	Breast adenocarcinoma
HCC15	M	lung	NSCLC-Squamous
HCC1500	F	breast	Breast adenocarcinoma-Invasive Ductal Carcinoma
HCC1569	F	breast	Metaplastic breast carcinoma
HCC1806	F	breast	Squamous breast carcinoma
HCC1937	F	breast	Breast adenocarcinoma-Invasive Ductal Carcinoma
HCC1954	F	breast	Breast adenocarcinoma-Invasive Ductal Carcinoma
HCC202	F	breast	Breast adenocarcinoma-Invasive Ductal Carcinoma
HCC2218	F	breast	Breast adenocarcinoma-Invasive Ductal Carcinoma
HCC33	M	lung	SCLC
HCC366	F	lung	NSCLC-Adenosquamous
HCC38	F	breast	Breast adenocarcinoma-Invasive Ductal Carcinoma
HCC44	F	lung	NSCLC-Adenocarcinoma
HCC70	F	breast	Breast adenocarcinoma-Invasive Ductal Carcinoma
HCC827	F	lung	NSCLC-Adenocarcinoma
HCC95	M	lung	NSCLC-Squamous
HCT116	M	large_intestine	Colon Carcinoma
HEC1A	F	endometrium	Endometrial adenocarcinoma
HEC251	F	endometrium	Endometrial adenocarcinoma
HEC50B	F	endometrium	Endometrial adenocarcinoma
HEC59	F	endometrium	Endometrial adenocarcinoma
HEL	M	leukemia	Acute Myelogenous LeukemiaÂ
HEP3B217	M	liver	Hepatocellular Carcinoma
HEYA8	F	ovary	Adenocarcinoma - High grade serous
HGC27		stomach	Carcinoma
HL60	F	leukemia	Acute Myelogenous LeukemiaÂ
HLF	M	liver	Hepatocellular Carcinoma
HPAC	F	pancreas	Ductal Adenocarcinoma
HPAFII	M	pancreas	Ductal Adenocarcinoma
HS294T	M	skin	Melanoma
HS578T	F	breast	Breast adenocarcinoma-Invasive Ductal Carcinoma
HS683	M	central_nervous_system	Glioma-Oligodendroglioma
HS766T	M	pancreas	Ductal Adenocarcinoma
HS944T	M	skin	Melanoma
HSC2	M	upper_aerodigestive_tract	Squamous cell carcinoma - Oral cavity
HSC3	M	upper_aerodigestive_tract	Squamous cell carcinoma - Tongue
HT1080	M	soft_tissue	Fibrosarcoma
HT1197	M	urinary_tract	Bladder carcinoma
HT144	M	skin	Melanoma
HT29	F	large_intestine	Colon Adenocarcinoma
HT55		large_intestine	Colon Carcinoma
HUG1N	M	stomach	Adenocarcinoma - Tubular
HUH1	M	liver	Hepatocellular Carcinoma
HUPT3	M	pancreas	Ductal Adenocarcinoma
HUTU80		small_intestine	Duodenal Adenocarcinoma
IALM	M	lung	NSCLC-Large Cell carcinoma
IGR1	M	skin	Melanoma
IGROV1	F	ovary	Adenocarcinoma - Endometrioid
IM95	M	stomach	Adenocarcinoma
IPC298	F	skin	Melanoma
JHH1	M	liver	Hepatocellular Carcinoma
JHH5	M	liver	Hepatocellular Carcinoma
JHOC5		ovary	Adenocarcinoma - Clear cell
JHOM1		ovary	Adenocarcinoma - Mucinous
JHOS2	F	ovary	Adenocarcinoma - High grade serous
JHUEM2	F	endometrium	Endometrial adenocarcinoma
JJN3	F	leukemia	Plasma cell myeloma
K029AX		skin	Melanoma
K562	F	leukemia	Chronic Myelogenous Leukemia
KALS1	F	central_nervous_system	Glioma-Other & Not specified
KARPAS422		leukemia	Diffuse large B cell lymphoma
KASUMI1	M	leukemia	Acute Myelogenous LeukemiaÂ
KATOIII	M	stomach	Adenocarcinoma
KE39	M	stomach	Adenocarcinoma
KM12		large_intestine	Colon Carcinoma
KMM1	M	leukemia	Plasma cell myeloma
KMRC1	M	kidney	Renal cell carcinoma - Clear cells
KMRC2	M	kidney	Renal cell carcinoma - Clear cells
KMS12BM	F	leukemia	Plasma cell myeloma
KNS60	M	central_nervous_system	Glioma-Astrocytoma Grade IV - Glioblastoma
KNS62	M	lung	NSCLC-Squamous
KNS81	M	central_nervous_system	Glioma-Astrocytoma Grade IV - Glioblastoma
KP2	F	pancreas	Carcinoma
KP4	M	pancreas	Carcinoma
KPL1	F	breast	Breast adenocarcinoma-Invasive Ductal Carcinoma
KURAMOCHI	F	ovary	Adenocarcinoma - High grade serous
KYSE140	M	oesophagus	Squamous cell carcinoma
KYSE150	F	oesophagus	Squamous cell carcinoma
KYSE180	M	oesophagus	Squamous cell carcinoma
KYSE30	M	oesophagus	Squamous cell carcinoma
KYSE450	M	oesophagus	Squamous cell carcinoma
KYSE510	F	oesophagus	Squamous cell carcinoma
KYSE520	F	oesophagus	Squamous cell carcinoma
KYSE70	M	oesophagus	Squamous cell carcinoma
L33		pancreas	Ductal Adenocarcinoma
L363	F	leukemia	Plasma cell myeloma
LAMA84	F	leukemia	Chronic Myelogenous Leukemia
LCLC103H	M	lung	NSCLC-Large Cell carcinoma
LCLC97TM1	M	lung	NSCLC-Large Cell carcinoma
LK2	M	lung	NSCLC-Squamous
LN18	M	central_nervous_system	Glioma-Astrocytoma Grade IV - Glioblastoma
LN229	F	central_nervous_system	Glioma-Astrocytoma Grade IV - Glioblastoma
LNCAPCLONEFGC	M	prostate	Carcinoma
LOUNH91	F	lung	NSCLC-Squamous
LOVO	M	large_intestine	Colon Adenocarcinoma
LOXIMVI		skin	Amelanotic melanoma
LS180	F	large_intestine	Colon Adenocarcinoma
LS411N	M	large_intestine	Cecum Adenocarcinoma
LS513	M	large_intestine	Cecum Adenocarcinoma
LU65	M	lung	NSCLC-Large Cell carcinoma
LU99	M	lung	NSCLC-Large Cell carcinoma
LUDLU1	M	lung	NSCLC-Squamous
LXF289	M	lung	NSCLC-Adenocarcinoma
M059K	M	central_nervous_system	Glioma-Astrocytoma Grade IV - Glioblastoma
MCF7	F	breast	Breast adenocarcinoma-Invasive Ductal Carcinoma
MDAMB157	F	breast	Breast adenocarcinoma
MDAMB175VII	F	breast	Breast adenocarcinoma-Invasive Ductal Carcinoma
MDAMB231	F	breast	Breast adenocarcinoma
MDAMB361	F	breast	Breast adenocarcinoma
MDAMB415	F	breast	Breast adenocarcinoma
MDAMB435S	F	skin	Amelanotic melanoma
MDAMB436	F	breast	Breast adenocarcinoma-Invasive Ductal Carcinoma
MDAMB453	F	breast	Breast adenocarcinoma
MDAMB468	F	breast	Breast adenocarcinoma
MDAPCA2B	M	prostate	Carcinoma
MELHO	F	skin	Melanoma
MELJUSO	F	skin	Melanoma
MEWO	M	skin	Melanoma
MFE280	F	endometrium	Endometrial adenocarcinoma
MHHES1	M	bone	Ewing sarcoma
MIAPACA2	M	pancreas	Ductal Adenocarcinoma
MKN1	M	stomach	Adenosquamous carcinoma
MKN45	F	stomach	Adenocarcinoma
MKN7	M	stomach	Adenocarcinoma - Tubular
MM1S		leukemia	Plasma cell myeloma
MOLM13	M	leukemia	Acute Myelogenous LeukemiaÂ
MONOMAC1	M	leukemia	Acute Myelogenous LeukemiaÂ
MONOMAC6	M	leukemia	Acute Myelogenous LeukemiaÂ
MORCPR		lung	NSCLC-Adenocarcinoma
MV411	M	leukemia	Acute Myelogenous LeukemiaÂ
NALM6	M	leukemia	Chronic Myelogenous Leukemia
NB4	F	leukemia	Acute Myelogenous LeukemiaÂ
NCCSTCK140		stomach	Carcinoma
NCIH1048	F	lung	SCLC
NCIH1105	M	lung	SCLC
NCIH1155	M	lung	NSCLC-Large Cell carcinoma
NCIH1299	M	lung	NSCLC-Large Cell carcinoma
NCIH1339	F	lung	SCLC
NCIH1355	M	lung	NSCLC-Adenocarcinoma
NCIH1395	F	lung	NSCLC-Adenocarcinoma
NCIH1437	M	lung	NSCLC-Adenocarcinoma
NCIH146	M	lung	SCLC
NCIH1568	F	lung	NSCLC-Adenocarcinoma
NCIH1581	M	lung	NSCLC-Large Cell carcinoma
NCIH1623	M	lung	NSCLC-Adenocarcinoma
NCIH1648	M	lung	NSCLC-Adenocarcinoma
NCIH1650	M	lung	NSCLC-Adenocarcinoma
NCIH1666	F	lung	NSCLC-Adenocarcinoma
NCIH1693	F	lung	NSCLC-Adenocarcinoma
NCIH1694	M	lung	SCLC
NCIH1703	M	lung	NSCLC-Adenocarcinoma
NCIH1792	M	lung	NSCLC-Adenocarcinoma
NCIH1876	M	lung	SCLC
NCIH1915	F	lung	NSCLC-Large Cell carcinoma
NCIH1944	F	lung	NSCLC-Adenocarcinoma
NCIH196	M	lung	SCLC
NCIH1975	F	lung	NSCLC-Adenocarcinoma
NCIH2009	F	lung	NSCLC-Adenocarcinoma
NCIH2023	M	lung	NSCLC-Adenocarcinoma
NCIH2030	M	lung	NSCLC-Adenocarcinoma
NCIH2052	M	pleura	Mesothelioma
NCIH2066	F	lung	SCLC
NCIH2087	M	lung	NSCLC-Adenocarcinoma
NCIH209	M	lung	SCLC
NCIH211	F	lung	SCLC
NCIH2110		lung	NSCLC-Other & Not Specified
NCIH2122	F	lung	NSCLC-Adenocarcinoma
NCIH2126	M	lung	NSCLC-Adenocarcinoma
NCIH2170	M	lung	NSCLC-Squamous
NCIH2171	M	lung	SCLC
NCIH2286	F	lung	SCLC
NCIH2291	M	lung	NSCLC-Adenocarcinoma
NCIH23	M	lung	NSCLC-Adenocarcinoma
NCIH2405	M	lung	NSCLC-Adenocarcinoma
NCIH2452	M	pleura	Mesothelioma
NCIH292	F	lung	Other & Not specified
NCIH322	M	lung	NSCLC-Adenocarcinoma
NCIH3255	F	lung	NSCLC-Adenocarcinoma
NCIH358	M	lung	NSCLC-Adenocarcinoma
NCIH441	M	lung	NSCLC-Adenocarcinoma
NCIH460	M	lung	NSCLC-Large Cell carcinoma
NCIH508	M	large_intestine	Cecum Adenocarcinoma
NCIH520	M	lung	NSCLC-Squamous
NCIH522	M	lung	NSCLC-Adenocarcinoma
NCIH526	M	lung	SCLC
NCIH647	M	lung	NSCLC-Adenosquamous
NCIH650	M	lung	NSCLC-Adenocarcinoma
NCIH660	M	prostate	Carcinoma - Small Cell
NCIH661	M	lung	NSCLC-Large Cell carcinoma
NCIH716		large_intestine	Cecum Adenocarcinoma
NCIH727	F	lung	Other & Not specified
NCIH838	M	lung	NSCLC-Adenocarcinoma
NCIH841	M	lung	SCLC
NCIH854		lung	NSCLC-Adenocarcinoma
NCIN87	M	stomach	Adenocarcinoma - Tubular
NOMO1	F	leukemia	Acute Myelogenous LeukemiaÂ
NUGC3	M	stomach	Adenocarcinoma
OAW42	F	ovary	Adenocarcinoma - Ovarian Cysts
OC314	F	ovary	Adenocarcinoma - Serous
OCIAML2	M	leukemia	Acute Myelogenous LeukemiaÂ
OCIAML3	M	leukemia	Acute Myelogenous LeukemiaÂ
OCIAML5	M	leukemia	Acute Myelogenous LeukemiaÂ
OE33	F	oesophagus	Adenocarcinoma (Barrett)
OPM2	F	leukemia	Plasma cell myeloma
OSRC2		kidney	Renal cell carcinoma
OV7	F	ovary	Carcinoma
OV90	F	ovary	Adenocarcinoma - High grade serous
OVCAR4	F	ovary	Adenocarcinoma - High grade serous
OVCAR8	F	ovary	Adenocarcinoma - High grade serous
OVISE	F	ovary	Adenocarcinoma - Clear cell
OVTOKO	F	ovary	Adenocarcinoma - Clear cell
PANC0327	F	pancreas	Ductal Adenocarcinoma
PANC0813	M	pancreas	Ductal Adenocarcinoma
PANC1005	M	pancreas	Ductal Adenocarcinoma
PC14		lung	NSCLC-Adenocarcinoma
PC3	M	prostate	Carcinoma
PECAPJ34CLONEC12	M	upper_aerodigestive_tract	Squamous cell carcinoma - Basaloid
PECAPJ49	M	upper_aerodigestive_tract	Squamous cell carcinoma - Tongue
PLCPRF5	M	liver	Hepatocellular Carcinoma
PSN1		pancreas	Ductal Adenocarcinoma
QGP1		pancreas	Somatostatinoma
RD	F	soft_tissue	Embryonal rhabdomyosarcoma
RDES	M	bone	Ewing sarcoma
REH		leukemia	B acute lymphoblastic leukemia
RERFLCAD2	M	lung	NSCLC-Adenocarcinoma
RERFLCAI	M	lung	NSCLC-Squamous
RH30	M	soft_tissue	Alveolar rhabdomyosarcoma
RH41	F	soft_tissue	Alveolar rhabdomyosarcoma
RKN	F	soft_tissue	Ovarian leiomyosarcoma
RKO		large_intestine	Colon Adenocarcinoma
RL952	F	endometrium	Endometrial adenosquamous carcinoma
RMGI	F	ovary	Adenocarcinoma - Clear cell
RMUGS	F	ovary	Adenocarcinoma - Mucinous
RS411	F	leukemia	B acute lymphoblastic leukemia
RT112	F	urinary_tract	Bladder carcinoma
SAOS2	F	bone	Osteosarcoma
SCC4	M	upper_aerodigestive_tract	Squamous cell carcinoma - Tongue
SEM	F	leukemia	B acute lymphoblastic leukemia
SF126		central_nervous_system	Glioma-Other & Not specified
SF295		central_nervous_system	Glioma-Astrocytoma Grade IV - Glioblastoma
SH4	F	skin	Melanoma
SHP77	M	lung	SCLC
SJSA1	M	bone	Osteosarcoma
SKCO1	M	large_intestine	Colon Adenocarcinoma
SKES1	M	bone	Ewing sarcoma
SKHEP1	M	liver	Hepatocellular Adenocarcinoma
SKMEL3	F	skin	Melanoma
SKMEL5	F	skin	Melanoma
SKMES1	M	lung	NSCLC-Squamous
SKMM2	M	leukemia	Plasma cell myeloma
SKOV3	F	ovary	Adenocarcinoma - Serous
SNU1076	M	upper_aerodigestive_tract	Squamous cell carcinoma - Larynx
SNU1105	M	central_nervous_system	Glioma-Astrocytoma Grade IV - Glioblastoma
SNU216	F	stomach	Adenocarcinoma - Tubular
SNU349	M	kidney	Renal cell carcinoma - Clear cells
SNU5	F	stomach	Adenocarcinoma
SNU601	M	stomach	Adenocarcinoma- Signet ring cell
SNU685	F	endometrium	Uterine carcinosarcoma
SNU719	M	stomach	Adenocarcinoma - Tubular
SNU8	F	ovary	Adenocarcinoma - Serous
SNU840	F	ovary	Brenner tumor
SNUC1	M	large_intestine	Colon Adenocarcinoma
SNUC2A	F	large_intestine	Cecum Adenocarcinoma
SU8686	F	pancreas	Ductal Adenocarcinoma
SUDHL10	M	leukemia	Diffuse large B cell lymphoma
SUDHL4	M	leukemia	Diffuse large B cell lymphoma
SUPT1	M	leukemia	T acute lymphoblastic leukemia
SW1271	M	lung	SCLC
SW1417	F	large_intestine	Colon Adenocarcinoma
SW1573	F	lung	NSCLC-Squamous
SW1783	M	central_nervous_system	Glioma-Astrocytoma Grade III- Anaplasic astrocytoma
SW48	F	large_intestine	Colon Adenocarcinoma
SW480	M	large_intestine	Colon Adenocarcinoma
SW620	M	large_intestine	Colon Adenocarcinoma
SW837	M	large_intestine	Rectal Adenocarcinoma
T47D	F	breast	Breast adenocarcinoma-Invasive Ductal Carcinoma
T98G	M	central_nervous_system	Glioma-Astrocytoma Grade IV - Glioblastoma
TC71	M	bone	Ewing sarcoma
TCCSUP	F	urinary_tract	Bladder carcinoma
TE1	M	oesophagus	Squamous cell carcinoma
TE10		oesophagus	Squamous cell carcinoma
TE11		oesophagus	Squamous cell carcinoma
TE15	F	oesophagus	Squamous cell carcinoma
TE4		oesophagus	Squamous cell carcinoma
TE6		oesophagus	Squamous cell carcinoma
TE8		oesophagus	Squamous cell carcinoma
TE9	M	oesophagus	Squamous cell carcinoma
THP1	M	leukemia	Acute Myelogenous LeukemiaÂ
TOV112D	F	ovary	Adenocarcinoma - Endometrioid
TOV21G	F	ovary	Adenocarcinoma - Clear cell
TT	M	oesophagus	Thyroid Cancer
TUHR10TKB		kidney	Renal cell carcinoma
TUHR14TKB		kidney	Renal cell carcinoma
TUHR4TKB		kidney	Renal cell carcinoma
TYKNU	F	ovary	Adenocarcinoma - High grade serous
U118MG	M	central_nervous_system	Glioma-Astrocytoma Grade IV - Glioblastoma
U251MG	M	central_nervous_system	Glioma-Other & Not specified
U2OS	F	bone	Osteosarcoma
U87MG	F	central_nervous_system	Glioma-Other & Not specified
U937	M	leukemia	Diffuse large B cell lymphoma
UACC257		skin	Melanoma
UACC812	F	breast	Breast adenocarcinoma-Invasive Ductal Carcinoma
VCAP	M	prostate	Carcinoma
WM115	F	skin	Melanoma
WM1799		skin	Melanoma
WM2664	F	skin	Melanoma
WM793		skin	Melanoma
WM88		skin	Melanoma
WM983B		skin	Melanoma
YD38	M	upper_aerodigestive_tract	Squamous cell carcinoma - Gingival
YD8	F	upper_aerodigestive_tract	Squamous cell carcinoma - Tongue
YKG1	F	central_nervous_system	Glioma-Astrocytoma Grade IV - Glioblastoma
ZR751	F	breast	Breast adenocarcinoma-Invasive Ductal Carcinoma
ZR7530	F	breast	Breast adenocarcinoma-Invasive Ductal Carcinoma

## Sheet: Supp_Table_S5_AML_CLs
Supplementary Table 5. AML cell lines included in the analysis.
Cell Line	Gender	Primary Site	Subtype
AML193	F	leukemia	Acute Myelogenous Leukemia
F36P	M	leukemia	Acute Myelogenous Leukemia
HEL	M	leukemia	Acute Myelogenous Leukemia
HL60	F	leukemia	Acute Myelogenous Leukemia
KASUMI1	M	leukemia	Acute Myelogenous Leukemia
MOLM13	M	leukemia	Acute Myelogenous Leukemia
MONOMAC1	M	leukemia	Acute Myelogenous Leukemia
MONOMAC6	M	leukemia	Acute Myelogenous Leukemia
MV411	M	leukemia	Acute Myelogenous Leukemia
NB4	F	leukemia	Acute Myelogenous Leukemia
NOMO1	F	leukemia	Acute Myelogenous Leukemia
OCIAML2	M	leukemia	Acute Myelogenous Leukemia
OCIAML3	M	leukemia	Acute Myelogenous Leukemia
OCIAML5	M	leukemia	Acute Myelogenous Leukemia
THP1	M	leukemia	Acute Myelogenous Leukemia

## Sheet: Supp_Table_S6_Pairs_Summary
Supplementary Table 6. Ranking of pairs mutation biomarker and essential genes in 19 tumor types using a covariate-based statistical model. For the final list of pairs (mutation vs essential gene), we set statistical filters (P-value < 0.05, localFDR ≤ 0.6 and |DDEMETER| > 2) and select those pairs that show a relationship in the String database -namely co-expression, annotation in the same pathw…
Supplementary Tables 7 to 24
Tumor	NumberOfPairs
AML	26	Supplementary Table 4
OS	20	Supplementary Table 7
BRCA	55	Supplementary Table 8
CNSA-IV	9	Supplementary Table 9
UCEC	254	Supplementary Table 10
COAD	322	Supplementary Table 11
DLBCL	18	Supplementary Table 12
MM	29	Supplementary Table 13
LUAD	31	Supplementary Table 14
LCC	42	Supplementary Table 15
NSCLC	176	Supplementary Table 16
SCLC	33	Supplementary Table 17
LUSC	30	Supplementary Table 18
ESCA	36	Supplementary Table 19
OVAD	93	Supplementary Table 20
PDAC	20	Supplementary Table 21
SKCM	13	Supplementary Table 22
STAD	74	Supplementary Table 23
CUADT	21	Supplementary Table 24

## Sheet: Supp_Table_S7_Pairs_OS
Gene_E	Mutation	deltaEs	t	P.Value	lfdr	nDeath_Target	Ess_Target	Ess_NoTarget	RestCL_deltaEs	RestCL_t	RestCL_P.Value	Same_Dir	String	Triade	Driver	nMut	nTargettable	pDeathTot	pDeathTarget	ensembl_gene_id	gene_biotype	transcript_length	Loc	Cancer	Drug	Indication	Function	Metabolic	molCIMA
CXCR4	EDN1	5.07	4.24481	0.000387678	0.053023	4	-4.4873	0.585603	-0.184279	-0.815579	0.415219	0	1	1	0	4	5	44.44	80	ENSG00000121966	protein_coding	2033	cytoplasm, plasma membrane		Pol6326, Burixafor, Msx-122, Framycetin, Ctce-9908, Bkt140, Plerixafor	BREAST NEOPLASMS, MULTIPLE MYELOMA, MYOCARDIAL INFARCTION, PROSTATIC NEOPLASMS, NEOPLASMS, NA, NA, LEUKEMIA, MYELOGENOUS, CHRONIC, BCR-ABL POSITIVE, NA	Inhibitor	0	0
PRKAR1A	MYO18B	-3.96	-3.81435	0.00116515	0.0752281	2	-3.40513	0.557558	-0.553916	-1.65726	0.0982385	1	1	1	0	2	2	22.22	100	ENSG00000108946	protein_coding	8565	cytoplasm	oncogene/suppressor, NA				0	0
CHAF1A	PRKDC	5.29	3.61659	0.00173567	0.135846	2	-2.79749	2.4882	-0.573862	-1.94596	0.0523485	0	1	1	0	6	3	22.22	66.67	ENSG00000167670	protein_coding	13509	nucleus					0	0
FBXW7	HIF1A	-3.37	-3.10997	0.00557004	0.149896	2	-1.9617	1.40939	0.0800474	0.334711	0.738016	0	1	1	0	5	5	22.22	40	ENSG00000109670	protein_coding	3956	cytoplasm	suppressor, NA				0	0
RPS27A	HIF1A	-5.01	-2.96473	0.00772211	0.160066	3	-2.06786	2.93798	-0.657764	-2.48058	0.0135209	1	1	1	0	5	5	33.33	60	ENSG00000143947	protein_coding	3956	cytoplasm, nucleus, plasma membrane					0	0
NR2C2AP	PGR	-5.7	-4.41417	0.000283238	0.174133	3	-4.37896	1.31888	-0.193787	-0.659622	0.50987	1	1	0	0	4	4	33.33	75	ENSG00000184162	protein_coding	13748						0	0
XRCC6	PRKDC	-7	-3.0099	0.0069562	0.18673	2	-1.3103	5.69273	-0.530674	-1.18439	0.236951	1	1	1	0	6	6	22.22	33.33	ENSG00000196419	protein_coding	13509	nucleus					0	0
BHLHE41	HIF1A	3.32	2.51318	0.0207486	0.206879	4	-3.22509	0.0962484	0.32178	2.33534	0.0200116	1	1	1	0	5	4	44.44	100	ENSG00000123095	protein_coding	3956	nucleus					0	0
EFTUD2	PRKDC	-4.28	-2.79553	0.0112144	0.208907	3	-1.62917	2.65417	-0.462429	-1.09712	0.273238	1	1	1	0	6	6	33.33	50	ENSG00000108883	protein_coding	13509	cytoplasm					0	0
CXCR4	HIF1A	4.55	2.41065	0.025782	0.222662	3	-4.23181	0.313396	0.0462124	0.228109	0.819676	1	1	1	0	5	4	33.33	75	ENSG00000121966	protein_coding	3956	cytoplasm, plasma membrane		Pol6326, Burixafor, Msx-122, Framycetin, Ctce-9908, Bkt140, Plerixafor	BREAST NEOPLASMS, MULTIPLE MYELOMA, MYOCARDIAL INFARCTION, PROSTATIC NEOPLASMS, NEOPLASMS, NA, NA, LEUKEMIA, MYELOGENOUS, CHRONIC, BCR-ABL POSITIVE, NA	Inhibitor	0	0
MAX	HIF1A	2.7	2.38591	0.0271563	0.226813	3	-2.55329	0.145762	-0.167291	-0.595927	0.551556	0	1	1	0	5	4	33.33	75	ENSG00000125952	protein_coding	3956	cytoplasm, nucleus	oncogene/suppressor, NA				0	0
TPM3	MYO18B	3.8	2.41694	0.0258407	0.235104	5	-2.75273	1.04735	0.0974455	0.369807	0.711719	1	1	1	0	2	7	55.56	71.43	ENSG00000143549	protein_coding	8565		oncogene, NA				0	0
TRIM28	HIF1A	2.85	2.23376	0.0372132	0.255307	3	-2.27681	0.574195	-0.358171	-2.02649	0.0433666	0	1	1	0	5	4	33.33	75	ENSG00000130726	protein_coding	3956	nucleus					0	0
P2RY6	KALRN	-2.59	-2.22684	0.038208	0.270136	2	-2.28572	0.300126	-0.0829967	-0.435794	0.663217	1	1	1	0	2	2	22.22	100	ENSG00000171631	protein_coding	10888	plasma membrane					0	0
PSKH2	MYO18B	2.55	2.14505	0.0450449	0.287369	2	-1.43646	1.11053	0.0103543	0.0589529	0.953019	1	1	1	0	2	7	22.22	28.57	ENSG00000147613	protein_coding	8565						0	0
MAP3K8	MECOM	4.4	3.32437	0.0034696	0.308543	2	-1.79573	2.60347	-0.168112	-0.613762	0.539716	0	1	1	0	2	7	22.22	28.57	ENSG00000107968	protein_coding	5732	cytoplasm	Unknown, NA				0	0
EZH2	MECOM	-4.37	-3.03147	0.00672392	0.38743	2	-2.8678	1.49753	0.247246	1.24305	0.214567	0	1	1	0	2	2	22.22	100	ENSG00000106462	protein_coding	5732	cytoplasm, nucleus	suppressor, NA				0	1
NCLN	CNTN6	-2.95	-2.86237	0.00997528	0.478251	3	-2.83334	0.11241	0.211311	1.25018	0.211951	0	1	1	0	4	4	33.33	75	ENSG00000125912	protein_coding	4513						0	0
MAP3K8	MYH11	2.74	2.52134	0.0200817	0.51665	2	-2.18372	0.561123	-0.481124	-1.29012	0.197743	0	1	1	0	5	4	22.22	50	ENSG00000107968	protein_coding	6941	cytoplasm	Unknown, NA				0	0
ZKSCAN3	AAK1	2.77	2.50811	0.0206616	0.521822	2	-1.86703	0.902966	-0.0484866	-0.446315	0.655607	0	1	1	0	5	4	22.22	50	ENSG00000189298	protein_coding	11345	cytoplasm, nucleus					0	0

## Sheet: Supp_Table_S8_Pairs_BRCA
Gene_E	Mutation	deltaEs	t	P.Value	lfdr	nDeath_Target	Ess_Target	Ess_NoTarget	RestCL_deltaEs	RestCL_t	RestCL_P.Value	Same_Dir	String	Triade	Driver	nMut	nTargettable	pDeathTot	pDeathTarget	ensembl_gene_id	gene_biotype	transcript_length	Loc	Cancer	Drug	Indication	Function	Metabolic	molCIMA
ICT1	ACACA	-6.34	-5.50615	7.05601e-06	0.0133565	6	-5.47955	0.85979	-0.432342	-1.54191	0.123898	1	1	1	0	6	6	27.27	100	ENSG00000167862	protein_coding	9962	mitochondrion					0	0
ICT1	ADCK3	-5.32	-4.76399	5.53815e-05	0.0373515	6	-4.2734	1.0424	0.134821	0.458488	0.646854	0	1	1	0	7	7	27.27	85.71	ENSG00000167862	protein_coding	5523	mitochondrion					0	0
UBC	TEC	-8.54	-4.68154	6.72106e-05	0.0466701	7	-8.09982	0.445063	0.218983	0.556064	0.578482	0	1	1	0	7	7	31.82	100	ENSG00000150991	protein_coding	3687	cytoplasm, nucleus, plasma membrane					0	0
UQCRC1	ADCK3	-2.69	-4.09822	0.000332913	0.0870975	7	-3.35482	-0.668798	-0.103853	-0.666609	0.505412	1	1	1	0	7	7	31.82	100	ENSG00000010256	protein_coding	5523	mitochondrion					1	0
SUMO2	HIF1A	-2.8	-2.85404	0.0080822	0.101065	6	-2.64162	0.16125	-0.124218	-0.6317	0.527949	1	1	1	0	10	10	27.27	60	ENSG00000188612	protein_coding	3956	nucleus					0	0
ESR1	HIF1A	-3.52	-2.68016	0.0122493	0.115621	7	-3.7846	-0.266232	-0.0022448	-0.0249555	0.980103	1	1	1	0	10	10	31.82	70	ENSG00000091831	protein_coding	3956	cytoplasm, Golgi apparatus, mitochondrion, nucleus, plasma membrane	suppressor, NA	Ospemifene, Fulvestrant, Melatonin, Fluoxymesterone, Gdc-0810, Clomifene, Naloxone, Bazedoxifene, Sr16234, Tamoxifen	NA, NA, NA, NA, BREAST NEOPLASMS, NA, NA, NA, BREAST NEOPLASMS, NA	Inhibitor	0	0
SP1	HIF1A	-2.65	-2.61401	0.014308	0.122234	4	-1.7478	0.899599	-0.288688	-1.84252	0.0661505	1	1	1	0	10	10	18.18	40	ENSG00000185591	protein_coding	3956	cytoplasm, nucleus					0	0
TFRC	HIF1A	-3.2	-2.60142	0.0147346	0.123573	7	-3.2243	-0.0207625	-0.226769	-0.788326	0.43098	1	1	1	0	10	10	31.82	70	ENSG00000072274	protein_coding	3956	extracellular, mitochondrion, plasma membrane, external side of plasma membrane	oncogene, NA				1	0
MED14	HIF1A	-3.45	-2.56392	0.0160758	0.127722	6	-3.02981	0.415671	-0.701152	-1.49163	0.136596	1	1	1	0	10	10	27.27	60	ENSG00000180182	protein_coding	3956	nucleus					0	0
PSMC3	HIF1A	-2.77	-2.53889	0.0170332	0.130636	6	-2.48873	0.281164	-0.349801	-1.51521	0.130522	1	1	1	0	10	10	27.27	60	ENSG00000165916	protein_coding	3956	cytoplasm, nucleus					0	0
PAFAH1B1	TEC	-6.04	-2.80725	0.00902745	0.155437	4	-6.48369	-0.442224	-0.163031	-0.428871	0.668252	1	1	1	0	7	7	18.18	57.14	ENSG00000007168	protein_coding	3687	cytoplasm					1	0
RPS27A	HIF1A	-1.47	-2.32427	0.0276779	0.161296	9	-2.70896	-1.23983	-0.625325	-2.34472	0.0195369	1	1	1	0	10	10	40.91	90	ENSG00000143947	protein_coding	3956	cytoplasm, nucleus, plasma membrane					0	0
RPL5	MECOM	-1.72	-2.37352	0.0247876	0.189203	7	-2.57211	-0.850217	-0.242086	-0.850323	0.395662	1	1	1	0	8	8	31.82	87.5	ENSG00000122406	protein_coding	5732	cytoplasm, nucleus	oncogene/suppressor, NA				0	0
MCM7	HIF1A	-3.56	-2.16008	0.0395798	0.193363	7	-4.51582	-0.957761	-0.684886	-1.7576	0.0795922	1	1	1	0	10	10	31.82	70	ENSG00000166508	protein_coding	3956	cytoplasm, nucleus					0	0
EP300	HIF1A	-2.05	-2.15456	0.0400496	0.194595	5	-2.07123	-0.0243275	0.76148	2.75576	0.00612746	0	1	1	0	10	10	22.73	50	ENSG00000100393	protein_coding	3956	cytoplasm, nucleus	suppressor, NA				0	0
UBC	BMP4	-7.84	-2.26753	0.0313027	0.214816	3	-8.09982	-0.261043	0.48532	0.941288	0.347134	0	1	1	0	5	5	13.64	60	ENSG00000150991	protein_coding	1917	cytoplasm, nucleus, plasma membrane					0	0
PIK3CA	ACACA	-8.24	-3.00621	0.00554514	0.215395	5	-8.1632	0.0800475	-0.297308	-0.898259	0.369596	1	1	1	0	6	6	22.73	83.33	ENSG00000121879	protein_coding	9962	plasma membrane	oncogene, NA	Pf-04691502, Pwt-33587, Gsk-1059615, Apitolisib, Panulisib, Puquitinib, Vs-5584, Voxtalisib, Sonolisib, Copanlisib, Dactolisib, Wx-037, Azd-6482, Cudc-907, Taselisib, Rg-7666, Ink-1117, Bay-1082439, Pilaralisib, Pictilisib, Pwt-33579, Buparlisib, Sf-1126, Gedatolisib, Mln-1117, Pa-799, Pki-179, Alpelisib, Ds-7423, Omipalisib, Zstk-474, Bgt-226, Ly-3023414, Recilisib	BREAST NEOPLASMS, NEOPLASMS, NA, NEOPLASMS, CARCINOMA, RENAL CELL, LYMPHOMA, NON-HODGKIN, NEOPLASMS, NA, LYMPHOMA, NA, NA, LYMPHOMA, NON-HODGKIN, NEOPLASMS, LYMPHOMA, LARGE B-CELL, DIFFUSE, LYMPHOMA, MANTLE-CELL, CARCINOMA, RENAL CELL, BREAST NEOPLASMS, ENDOMETRIAL NEOPLASMS, CARCINOMA, NEOPLASMS, PROSTATIC NEOPLASMS, NEOPLASMS, NA, NA, CARCINOMA, SQUAMOUS CELL, LYMPHOMA, LYMPHOMA, NON-HODGKIN, N…	Inhibitor	1	0
MRPL15	ACACA	-3.81	-2.85698	0.00799303	0.229721	6	-4.24587	-0.431053	0.0962945	0.450216	0.652802	0	1	1	0	6	6	27.27	100	ENSG00000137547	protein_coding	9962	mitochondrion					0	0
MCM7	MECOM	-3.56	-2.10908	0.0440965	0.234963	6	-4.51582	-0.957761	0.288984	0.721853	0.470813	0	1	1	0	8	8	27.27	75	ENSG00000166508	protein_coding	5732	cytoplasm, nucleus					0	0
EIF2S3	KAT6B	-2.01	-2.35402	0.0257917	0.24603	5	-2.32513	-0.316061	-0.102485	-0.463951	0.642939	1	1	1	0	8	8	22.73	62.5	ENSG00000130741	protein_coding	8287	cytoplasm					0	0
GAK	MECOM	2.36	2.05647	0.0492542	0.246299	7	-1.75929	0.596377	0.0452227	0.148134	0.882312	1	1	1	0	8	14	31.82	50	ENSG00000178950	protein_coding	5732	Golgi apparatus					0	0
MRPS15	ACACA	-3.54	-2.62541	0.0138886	0.257733	6	-3.84672	-0.302872	-0.0763876	-0.273034	0.78497	1	1	1	0	6	6	27.27	100	ENSG00000116898	protein_coding	9962	mitochondrion					0	0
CS	ACACA	-2.21	-2.45156	0.0207499	0.283372	4	-2.63113	-0.420517	0.020132	0.142241	0.886962	0	1	1	0	6	6	18.18	66.67	ENSG00000062485	protein_coding	9962	mitochondrion, nucleus					1	0
ATP5A1	MSH3	-3.55	-3.308	0.00260109	0.289502	3	-3.93552	-0.389462	-0.0424044	-0.178842	0.858153	1	1	1	0	5	5	13.64	60	ENSG00000152234	protein_coding	4092	mitochondrion, plasma membrane					1	0
SON	NFIA	-2.4	-3.02208	0.00534713	0.289669	5	-2.32771	0.0687781	0.163905	0.678491	0.497859	0	1	1	0	10	10	22.73	50	ENSG00000159140	protein_coding	9487						0	0
CTNNBL1	KAT6B	-3.22	-2.13818	0.041335	0.300611	4	-3.34571	-0.123236	-0.246662	-0.816438	0.414743	1	1	1	0	8	8	18.18	50	ENSG00000132792	protein_coding	8287	cytoplasm, nucleus					0	0
PNPT1	ACACA	-3.04	-2.33991	0.0266759	0.302174	6	-5.33893	-2.2978	0.148047	0.406155	0.684849	0	1	1	0	6	6	27.27	100	ENSG00000138035	protein_coding	9962	cytoplasm, mitochondrion					0	0
POLR2F	ERCC6	-2.93	-2.06901	0.0479664	0.303611	3	-4.39223	-1.45785	-0.902239	-1.783	0.0753558	1	1	1	0	4	4	13.64	75	ENSG00000100142	protein_coding	11026	nucleus					0	0
ADSL	ACACA	-6.04	-2.2713	0.0310439	0.314797	4	-7.58884	-1.55232	-0.293238	-0.801263	0.423462	1	1	1	0	6	6	18.18	66.67	ENSG00000239900	protein_coding	9962						1	0
SUZ12	ACACA	-4.39	-2.24039	0.0332156	0.320786	5	-4.51087	-0.120543	0.0169996	0.037405	0.970181	0	1	1	0	6	6	22.73	83.33	ENSG00000178691	protein_coding	9962	nucleus	oncogene/suppressor, NA				0	0
ACO2	ACACA	-2.25	-2.18691	0.0372987	0.33164	4	-2.66935	-0.419566	0.224105	0.855021	0.393059	0	1	1	0	6	6	18.18	66.67	ENSG00000100412	protein_coding	9962	mitochondrion, nucleus					1	0
MRPS22	ADCK3	-2.13	-2.45821	0.0205532	0.332862	6	-2.78149	-0.654935	-0.049543	-0.299056	0.765055	1	1	1	0	7	7	27.27	85.71	ENSG00000175110	protein_coding	5523	mitochondrion					0	0
CMPK1	ACACA	1.54	2.04907	0.0499686	0.362992	7	-1.59431	-0.051976	-0.380951	-1.68874	0.0920607	0	1	1	0	6	16	31.82	43.75	ENSG00000162368	protein_coding	9962	cytoplasm, nucleus					1	0
UBR5	PGR	-5.5	-3.27788	0.00278412	0.365297	6	-6.5134	-1.00886	-0.274732	-0.741592	0.458776	1	1	0	0	6	6	27.27	100	ENSG00000104517	protein_coding	13748	cytoplasm, nucleus	Unknown, NA				0	0
UBC	DACH1	-5.48	-2.33011	0.027263	0.365569	4	-5.67979	-0.203488	0.116879	0.275897	0.782772	0	1	1	0	6	6	18.18	66.67	ENSG00000150991	protein_coding	5233	cytoplasm, nucleus, plasma membrane					0	0
ATP5A1	TP53	1.63	2.77337	0.00977796	0.41461	5	-1.51093	0.11748	0.193965	0.871287	0.384128	1	1	1	0	11	11	22.73	45.45	ENSG00000152234	protein_coding	2724	mitochondrion, plasma membrane					1	0
CSNK1A1	TP53	5.59	3.20407	0.00337951	0.41461	10	-5.83011	-0.239296	1.09654	3.18504	0.00156249	1	1	1	0	11	11	45.45	90.91	ENSG00000113712	protein_coding	2724						0	0
PTCD3	TP53	3.51	2.33971	0.0266859	0.41461	7	-3.36433	0.14085	0.296255	1.49331	0.136157	1	1	1	0	11	11	31.82	63.64	ENSG00000132300	protein_coding	2724	mitochondrion					0	0
RPS7	TP53	2.89	3.03674	0.00514034	0.41461	8	-2.83592	0.0570335	0.545928	2.36477	0.018525	1	1	1	0	11	11	36.36	72.73	ENSG00000171863	protein_coding	2724	cytoplasm, nucleus					0	0
SERBP1	TP53	1.93	3.39175	0.0020932	0.41461	5	-1.69991	0.23323	0.460388	2.24955	0.0250287	1	1	1	0	11	11	22.73	45.45	ENSG00000142864	protein_coding	2724	cytoplasm, nucleus, plasma membrane					0	0
USP7	TP53	4.68	2.67153	0.0124593	0.41461	7	-2.73015	1.94513	1.36602	5.65389	3.01574e-08	1	1	1	0	11	11	31.82	63.64	ENSG00000187555	protein_coding	2724	nucleus					0	0
ZNF250	EPHA5	-3.27	-2.16497	0.0391348	0.420106	3	-4.15437	-0.886659	-0.539205	-1.66385	0.0969365	1	1	1	0	4	4	13.64	75	ENSG00000196150	protein_coding	8421	nucleus					0	0
SP3	EPHA5	-2.56	-2.12013	0.0430624	0.425177	3	-2.82423	-0.261875	0.19839	0.771118	0.441099	0	1	1	0	4	4	13.64	75	ENSG00000172845	protein_coding	8421	cytoplasm, Golgi apparatus, nucleus, plasma membrane					0	0
RPA2	MLH1	-2.47	-2.07919	0.0468978	0.434413	4	-4.99828	-2.53131	-0.40599	-0.710166	0.478021	1	1	1	0	4	4	18.18	100	ENSG00000117748	protein_coding	2752	nucleus					0	0
MYH9	TP53	1.87	2.15834	0.039657	0.435931	6	-2.31186	-0.44262	0.31212	1.22678	0.220637	1	1	1	0	11	11	27.27	54.55	ENSG00000100345	protein_coding	2724	cytoplasm, nucleus, plasma membrane	oncogene, NA				0	0
CSE1L	TP53	2.16	2.06365	0.0484657	0.455749	6	-2.78957	-0.628791	0.552504	1.301	0.194017	1	1	1	0	11	11	27.27	54.55	ENSG00000124207	protein_coding	2724	cytoplasm, nucleus					0	0
CAD	DIP2C	-1.87	-2.22465	0.0342904	0.462287	4	-3.24213	-1.36833	-0.228638	-0.590738	0.555034	1	1	1	0	4	4	18.18	100	ENSG00000084774	protein_coding	7888	nucleus	oncogene, NA				1	0
ZSCAN21	EPHB6	-2.56	-2.51814	0.0178042	0.50348	4	-2.96109	-0.399141	-0.279924	-0.918344	0.359001	1	1	1	0	4	4	18.18	100	ENSG00000166529	protein_coding	4409	nucleus					0	0
SRSF7	NFIA	-2.67	-2.20926	0.035581	0.50487	7	-2.8886	-0.2186	-0.144339	-0.62302	0.533632	1	1	1	0	10	10	31.82	70	ENSG00000115875	protein_coding	9487	cytoplasm, nucleus					0	0
NDUFAB1	CARD10	-2.37	-2.81597	0.00881146	0.52897	4	-2.95554	-0.58621	-0.240398	-0.779343	0.436245	1	1	1	0	4	4	18.18	100	ENSG00000004779	protein_coding	4113	mitochondrion		Me-344, Metformin, Nv-128	NA, FATTY LIVER, PROSTATIC NEOPLASMS, CARCINOMA, SQUAMOUS CELL, ADENOCARCINOMA, PERITONEAL NEOPLASMS, OBESITY, COLORECTAL NEOPLASMS, HIV INFECTIONS, BRAIN NEOPLASMS, RECTAL NEOPLASMS, PANCREATIC NEOPLASMS, DIABETES MELLITUS, TYPE 2, BREAST NEOPLASMS, CARCINOMA, NON-SMALL-CELL LUNG, PERIODONTITIS, MELANOMA, LUNG NEOPLASMS, NEOPLASMS, WEIGHT GAIN, DIABETES, GESTATIONAL, DIABETIC FOOT, HYPERPLASIA, …	Inhibitor	1	0
RBBP4	DYRK1A	-5.74	-2.26113	0.0317465	0.529281	4	-5.39835	0.339301	0.75025	1.84816	0.0653285	0	1	1	0	6	6	18.18	66.67	ENSG00000162521	protein_coding	8654	nucleus					0	0
UBR5	EPHB6	-4.43	-2.25866	0.0318975	0.537492	4	-6.01826	-1.58579	-0.483671	-0.96984	0.332721	1	1	1	0	4	4	18.18	100	ENSG00000104517	protein_coding	4409	cytoplasm, nucleus	Unknown, NA				0	0
HSPE1	CARD10	-2.04	-2.19028	0.0369989	0.547577	4	-3.20786	-1.17047	-0.5594	-1.28115	0.200895	1	1	1	0	4	4	18.18	100	ENSG00000115541	protein_coding	4113	cytoplasm, mitochondrion					0	0
DNM1L	EPHB6	-2.85	-2.18571	0.0373762	0.551041	3	-3.23084	-0.37839	0.194817	0.812204	0.417165	0	1	1	0	4	4	13.64	75	ENSG00000087470	protein_coding	4409	cytoplasm, Golgi apparatus, mitochondrion					0	0
TACC3	AKAP9	-3.43	-2.95801	0.00622546	0.590132	6	-1.94506	1.48485	0.151201	0.678498	0.497854	0	1	0	0	13	13	27.27	46.15	ENSG00000013810	protein_coding	12471	cytoplasm					0	0

## Sheet: Supp_Table_S9_Pairs_CNSA-IV
Gene_E	Mutation	deltaEs	t	P.Value	lfdr	nDeath_Target	Ess_Target	Ess_NoTarget	RestCL_deltaEs	RestCL_t	RestCL_P.Value	Same_Dir	String	Triade	Driver	nMut	nTargettable	pDeathTot	pDeathTarget	ensembl_gene_id	gene_biotype	transcript_length	Loc	Cancer	Drug	Indication	Function	Metabolic	molCIMA
PRKAR1A	NPR1	3.58	2.55268	0.0178949	0.25931	4	-2.78264	0.799185	-0.0169675	-0.0799354	0.936328	0	1	1	0	7	8	26.67	50	ENSG00000108946	protein_coding	4236	cytoplasm	oncogene/suppressor, NA				0	0
PPP1R12A	AAK1	3.68	2.6738	0.0135041	0.385279	7	-2.8371	0.846956	0.0419198	0.122181	0.902817	1	1	1	0	4	11	46.67	63.64	ENSG00000058272	protein_coding	11345	cytoplasm					0	0
PPP1R12A	ROCK1	-5.57	-3.46433	0.00209351	0.411642	3	-6.19453	-0.628593	0.460905	0.66597	0.505812	0	1	0	0	3	3	20	100	ENSG00000058272	protein_coding	9484	cytoplasm					0	0
SRPK1	PDGFRA	-2.13	-2.69067	0.0131496	0.458929	3	-2.04607	0.0867417	-0.152553	-0.931987	0.351903	1	1	1	0	5	5	20	60	ENSG00000096063	protein_coding	6576	cytoplasm, endoplasmic reticulum, nucleus, plasma membrane					0	0
MYBL1	KAT6B	-2.86	-2.33743	0.0285024	0.478561	3	-2.14173	0.721151	0.0985237	0.837769	0.402658	0	1	1	0	4	4	20	75	ENSG00000185697	protein_coding	8287	nucleus					0	0
TIAM1	PRKCA	-3.45	-2.90243	0.00810005	0.482173	3	-4.15457	-0.700685	-0.252428	-1.18381	0.237189	1	1	1	0	3	3	20	100	ENSG00000156299	protein_coding	8751	cytoplasm, nucleus					0	0
MAPK1	TP53	3.91	2.5041	0.0199036	0.493392	4	-2.28433	1.62587	0.171139	0.719976	0.471958	1	1	0	0	9	6	26.67	66.67	ENSG00000100030	protein_coding	2724	cytoplasm, Golgi apparatus, mitochondrion, nucleus		Mk-8353, Ulixertinib, Purvalanol, Gdc-0994	NEOPLASMS, NA, NA, NEOPLASMS	Inhibitor	0	0
EEF1A1	TP63	-2.58	-3.05539	0.0056616	0.496736	5	-2.91197	-0.331134	-0.985403	-2.36433	0.0185376	1	1	1	0	7	7	33.33	71.43	ENSG00000156508	protein_coding	4909	cytoplasm, nucleus	suppressor, NA				0	0
MAPK1	EP300	3.48	2.09932	0.047023	0.498175	4	-0.807041	2.66962	-0.0437047	-0.173794	0.862115	0	1	1	0	6	9	26.67	44.44	ENSG00000100030	protein_coding	9587	cytoplasm, Golgi apparatus, mitochondrion, nucleus		Mk-8353, Ulixertinib, Purvalanol, Gdc-0994	NEOPLASMS, NA, NA, NEOPLASMS	Inhibitor	0	0

## Sheet: Supp_Table_S10_Pairs_UCEC
Gene_E	Mutation	deltaEs	t	P.Value	lfdr	nDeath_Target	Ess_Target	Ess_NoTarget	RestCL_deltaEs	RestCL_t	RestCL_P.Value	Same_Dir	String	Triade	Driver	nMut	nTargettable	pDeathTot	pDeathTarget	ensembl_gene_id	gene_biotype	transcript_length	Loc	Cancer	Drug	Indication	Function	Metabolic	molCIMA
UBC	MGA	8.27	6.02921	9.59051e-06	0.0209218	3	-5.18841	3.08355	0.886539	1.43192	0.152933	1	1	1	0	4	3	42.86	100	ENSG00000150991	protein_coding	14439	cytoplasm, nucleus, plasma membrane					0	0
UBC	PCM1	-8.27	-6.02921	9.59051e-06	0.0209218	3	-5.18841	3.08355	0.934572	1.67132	0.0954259	0	1	1	0	3	3	42.86	100	ENSG00000150991	protein_coding	8287	cytoplasm, nucleus, plasma membrane					0	0
UBC	KLK7	8.27	6.02921	9.59051e-06	0.0209218	3	-5.18841	3.08355	0.0718631	0.186426	0.852203	1	1	1	0	4	3	42.86	100	ENSG00000150991	protein_coding	1975	cytoplasm, nucleus, plasma membrane					0	0
ASNS	STK24	-7.5	-5.00733	2.73056e-05	0.0385648	3	-7.18085	0.322922	-0.503169	-0.679608	0.497138	1	1	1	0	3	3	42.86	100	ENSG00000070669	protein_coding	9361						1	0
ATF4	PRKCB	-10.02	-4.17531	0.000486726	0.0491151	2	-8.8049	1.21629	-0.347165	-0.520719	0.602845	1	1	1	0	2	2	28.57	100	ENSG00000128272	protein_coding	7969	cytoplasm, nucleus					0	0
PSMD12	MSH3	6.22	3.86348	0.00100153	0.0621208	2	-6.147	0.0710558	-0.0924665	-0.266203	0.790217	0	1	1	0	5	2	28.57	100	ENSG00000197170	protein_coding	4092	cytoplasm					0	0
PSMD12	HSPB1	-6.22	-3.86348	0.00100153	0.0621208	2	-6.147	0.0710558	0.0742093	0.0605429	0.951753	0	1	1	0	2	2	28.57	100	ENSG00000197170	protein_coding	1455	cytoplasm					0	0
DLST	MSH3	5.76	3.74005	0.00133213	0.0679643	2	-5.89547	-0.13203	-0.816578	-2.42682	0.0156643	0	1	1	0	5	2	28.57	100	ENSG00000119689	protein_coding	4092	mitochondrion, nucleus, plasma membrane					1	0
SMC3	MSH3	5.34	3.60499	0.00181883	0.0749038	2	-5.1995	0.14493	-0.04974	-0.160733	0.872383	0	1	1	0	5	2	28.57	100	ENSG00000108055	protein_coding	4092	cytoplasm, nucleus	Unknown, NA				0	0
MASTL	AURKA	-8.01	-4.69676	0.000126631	0.0763106	2	-5.11593	2.89857	0.10607	0.116071	0.907653	0	1	1	0	2	2	28.57	100	ENSG00000120539	protein_coding	2248	cytoplasm, nucleus					0	0
MASTL	MASTL	-8.01	-4.69676	0.000126631	0.0763106	2	-5.11593	2.89857	-0.88044	-1.43043	0.153359	1	1	1	1	2	2	28.57	100	ENSG00000120539	protein_coding	3623	cytoplasm, nucleus					0	0
UBC	MAPKAPK3	-6.86	-2.86822	0.0109155	0.0791398	3	-4.73289	2.12219	-0.257508	-0.623164	0.533525	1	1	1	0	4	4	42.86	75	ENSG00000150991	protein_coding	2988	cytoplasm, nucleus, plasma membrane					0	0
KIF23	MSH3	6.23	3.48176	0.00241424	0.0818364	2	-5.9945	0.231789	-0.308937	-1.4453	0.149141	0	1	1	0	5	2	28.57	100	ENSG00000137807	protein_coding	4092	nucleus					0	0
KIF23	FANCI	-6.23	-3.48176	0.00241424	0.0818364	2	-5.9945	0.231789	-0.0943629	-0.217039	0.828287	1	1	1	0	2	2	28.57	100	ENSG00000137807	protein_coding	4743	nucleus					0	0
PSMD3	HSPB1	-4.82	-3.39863	0.00292058	0.0869048	2	-5.56868	-0.74802	-0.643506	-0.594348	0.552609	1	1	1	0	2	2	28.57	100	ENSG00000108344	protein_coding	1455	cytoplasm, nucleus					0	0
MED14	ABL1	11.72	4.05923	0.000388086	0.0924887	3	-3.34294	8.38033	-0.52084	-0.399992	0.689372	0	1	1	0	2	5	42.86	60	ENSG00000180182	protein_coding	5766	nucleus					0	0
BCL2L1	TP53	-9.67	-5.04949	3.95897e-05	0.0933094	3	-7.10955	2.55613	-0.654346	-1.40522	0.160716	1	1	0	0	3	3	42.86	100	ENSG00000171552	protein_coding	2724	cytoplasm, mitochondrion	literature, Apoptosis	Obatoclax, Navitoclax	MYELODYSPLASTIC SYNDROMES, PRIMARY MYELOFIBROSIS, LEUKEMIA, LYMPHOCYTIC, CHRONIC, B-CELL, HODGKIN DISEASE, NEOPLASMS, SMALL CELL LUNG CARCINOMA, LEUKEMIA, LYMPHOCYTIC, CHRONIC, B-CELL	Inhibitor	0	1
PSMA4	HSPB1	-6.39	-3.29526	0.00369735	0.093728	2	-6.02619	0.362395	1.5793	0.961316	0.336963	0	1	1	0	2	2	28.57	100	ENSG00000041357	protein_coding	1455	cytoplasm, nucleus		Oprozomib, Bortezomib, Carfilzomib, Ixazomib Citrate	NEOPLASMS, LEUKEMIA, LEUKEMIA, PROMYELOCYTIC, ACUTE, CARCINOMA, RENAL CELL, LYMPHOMA, FOLLICULAR, MULTIPLE MYELOMA, AMYLOIDOSIS, FAMILIAL, WALDENSTROM MACROGLOBULINEMIA, NEOPLASMS, MUSCULAR DYSTROPHIES, BREAST NEOPLASMS, LEUKEMIA, MYELOID, ACUTE, NEUROBLASTOMA, LYMPHOMA, BRONCHIOLITIS OBLITERANS, LYMPHOMA, LARGE B-CELL, DIFFUSE, MELANOMA, MESOTHELIOMA, GRAFT VS HOST DISEASE, LUNG NEOPLASMS, CARCI…	Inhibitor	0	0
PSMD8	HSPB1	-4.86	-3.26725	0.00394056	0.0956883	2	-4.35421	0.505272	0.381808	0.514577	0.607128	0	1	1	0	2	2	28.57	100	ENSG00000099341	protein_coding	1455	nucleus					0	0
TOP2A	MASTL	-7.45	-4.35016	0.000288109	0.0999519	2	-4.52334	2.92669	-0.289989	-0.474542	0.635367	1	1	1	0	2	2	28.57	100	ENSG00000131747	protein_coding	3623	nucleus		Valrubicin, Levofloxacin, Aldoxorubicin, Etoposide, Ofloxacin, Daunorubicin, Enoxacin, Mm-302, Podofilox, Fleroxacin, Doxorubicin, Norfloxacin, Mitoxantrone, Lucanthone, Idarubicin, Epirubicin, Lomefloxacin, Ciprofloxacin, Etoposide Phosphate, Dexrazoxane, Sparfloxacin, Moxifloxacin, Amrubicin, Finafloxacin, Trovafloxacin, Pefloxacin, Teniposide	URINARY BLADDER NEOPLASMS, CARCINOMA, NEOPLASMS, NA, GLIOBLASTOMA, NEOPLASMS, SMALL CELL LUNG CARCINOMA, SARCOMA, NA, NA, LEUKEMIA, MYELOID, ACUTE, NEOPLASMS, SARCOMA, LEUKEMIA, NA, BREAST NEOPLASMS, NA, NA, LYMPHOMA, T-CELL, CUTANEOUS, NEOPLASMS, BREAST NEOPLASMS, URINARY BLADDER NEOPLASMS, GLIOMA, SARCOMA, CARCINOMA, OVARIAN NEOPLASMS, CARCINOMA, HEPATOCELLULAR, SMALL CELL LUNG CARCINOMA, LYMPH…	Inhibitor	0	0
TOP2A	AURKA	-7.45	-4.35016	0.000288109	0.0999519	2	-4.52334	2.92669	-0.796264	-0.880418	0.379151	1	1	1	0	2	2	28.57	100	ENSG00000131747	protein_coding	2248	nucleus		Valrubicin, Levofloxacin, Aldoxorubicin, Etoposide, Ofloxacin, Daunorubicin, Enoxacin, Mm-302, Podofilox, Fleroxacin, Doxorubicin, Norfloxacin, Mitoxantrone, Lucanthone, Idarubicin, Epirubicin, Lomefloxacin, Ciprofloxacin, Etoposide Phosphate, Dexrazoxane, Sparfloxacin, Moxifloxacin, Amrubicin, Finafloxacin, Trovafloxacin, Pefloxacin, Teniposide	URINARY BLADDER NEOPLASMS, CARCINOMA, NEOPLASMS, NA, GLIOBLASTOMA, NEOPLASMS, SMALL CELL LUNG CARCINOMA, SARCOMA, NA, NA, LEUKEMIA, MYELOID, ACUTE, NEOPLASMS, SARCOMA, LEUKEMIA, NA, BREAST NEOPLASMS, NA, NA, LYMPHOMA, T-CELL, CUTANEOUS, NEOPLASMS, BREAST NEOPLASMS, URINARY BLADDER NEOPLASMS, GLIOMA, SARCOMA, CARCINOMA, OVARIAN NEOPLASMS, CARCINOMA, HEPATOCELLULAR, SMALL CELL LUNG CARCINOMA, LYMPH…	Inhibitor	0	0
TOP2A	WDHD1	-7.45	-4.35016	0.000288109	0.0999519	2	-4.52334	2.92669	-0.386475	-0.828326	0.40797	1	1	1	0	2	2	28.57	100	ENSG00000131747	protein_coding	5996	nucleus		Valrubicin, Levofloxacin, Aldoxorubicin, Etoposide, Ofloxacin, Daunorubicin, Enoxacin, Mm-302, Podofilox, Fleroxacin, Doxorubicin, Norfloxacin, Mitoxantrone, Lucanthone, Idarubicin, Epirubicin, Lomefloxacin, Ciprofloxacin, Etoposide Phosphate, Dexrazoxane, Sparfloxacin, Moxifloxacin, Amrubicin, Finafloxacin, Trovafloxacin, Pefloxacin, Teniposide	URINARY BLADDER NEOPLASMS, CARCINOMA, NEOPLASMS, NA, GLIOBLASTOMA, NEOPLASMS, SMALL CELL LUNG CARCINOMA, SARCOMA, NA, NA, LEUKEMIA, MYELOID, ACUTE, NEOPLASMS, SARCOMA, LEUKEMIA, NA, BREAST NEOPLASMS, NA, NA, LYMPHOMA, T-CELL, CUTANEOUS, NEOPLASMS, BREAST NEOPLASMS, URINARY BLADDER NEOPLASMS, GLIOMA, SARCOMA, CARCINOMA, OVARIAN NEOPLASMS, CARCINOMA, HEPATOCELLULAR, SMALL CELL LUNG CARCINOMA, LYMPH…	Inhibitor	0	0
TOP2A	STAG3	-7.45	-4.35016	0.000288109	0.0999519	2	-4.52334	2.92669	-0.96109	-1.65864	0.0979568	1	1	1	0	2	2	28.57	100	ENSG00000131747	protein_coding	4450	nucleus		Valrubicin, Levofloxacin, Aldoxorubicin, Etoposide, Ofloxacin, Daunorubicin, Enoxacin, Mm-302, Podofilox, Fleroxacin, Doxorubicin, Norfloxacin, Mitoxantrone, Lucanthone, Idarubicin, Epirubicin, Lomefloxacin, Ciprofloxacin, Etoposide Phosphate, Dexrazoxane, Sparfloxacin, Moxifloxacin, Amrubicin, Finafloxacin, Trovafloxacin, Pefloxacin, Teniposide	URINARY BLADDER NEOPLASMS, CARCINOMA, NEOPLASMS, NA, GLIOBLASTOMA, NEOPLASMS, SMALL CELL LUNG CARCINOMA, SARCOMA, NA, NA, LEUKEMIA, MYELOID, ACUTE, NEOPLASMS, SARCOMA, LEUKEMIA, NA, BREAST NEOPLASMS, NA, NA, LYMPHOMA, T-CELL, CUTANEOUS, NEOPLASMS, BREAST NEOPLASMS, URINARY BLADDER NEOPLASMS, GLIOMA, SARCOMA, CARCINOMA, OVARIAN NEOPLASMS, CARCINOMA, HEPATOCELLULAR, SMALL CELL LUNG CARCINOMA, LYMPH…	Inhibitor	0	0
TOP2A	HMMR	-7.45	-4.35016	0.000288109	0.0999519	2	-4.52334	2.92669	-1.63501	-2.62472	0.00899794	1	1	1	0	2	2	28.57	100	ENSG00000131747	protein_coding	3102	nucleus		Valrubicin, Levofloxacin, Aldoxorubicin, Etoposide, Ofloxacin, Daunorubicin, Enoxacin, Mm-302, Podofilox, Fleroxacin, Doxorubicin, Norfloxacin, Mitoxantrone, Lucanthone, Idarubicin, Epirubicin, Lomefloxacin, Ciprofloxacin, Etoposide Phosphate, Dexrazoxane, Sparfloxacin, Moxifloxacin, Amrubicin, Finafloxacin, Trovafloxacin, Pefloxacin, Teniposide	URINARY BLADDER NEOPLASMS, CARCINOMA, NEOPLASMS, NA, GLIOBLASTOMA, NEOPLASMS, SMALL CELL LUNG CARCINOMA, SARCOMA, NA, NA, LEUKEMIA, MYELOID, ACUTE, NEOPLASMS, SARCOMA, LEUKEMIA, NA, BREAST NEOPLASMS, NA, NA, LYMPHOMA, T-CELL, CUTANEOUS, NEOPLASMS, BREAST NEOPLASMS, URINARY BLADDER NEOPLASMS, GLIOMA, SARCOMA, CARCINOMA, OVARIAN NEOPLASMS, CARCINOMA, HEPATOCELLULAR, SMALL CELL LUNG CARCINOMA, LYMPH…	Inhibitor	0	0
TOP2A	RB1	-7.45	-4.35016	0.000288109	0.0999519	2	-4.52334	2.92669	-0.589665	-1.20909	0.227331	1	1	1	0	2	2	28.57	100	ENSG00000131747	protein_coding	4840	nucleus		Valrubicin, Levofloxacin, Aldoxorubicin, Etoposide, Ofloxacin, Daunorubicin, Enoxacin, Mm-302, Podofilox, Fleroxacin, Doxorubicin, Norfloxacin, Mitoxantrone, Lucanthone, Idarubicin, Epirubicin, Lomefloxacin, Ciprofloxacin, Etoposide Phosphate, Dexrazoxane, Sparfloxacin, Moxifloxacin, Amrubicin, Finafloxacin, Trovafloxacin, Pefloxacin, Teniposide	URINARY BLADDER NEOPLASMS, CARCINOMA, NEOPLASMS, NA, GLIOBLASTOMA, NEOPLASMS, SMALL CELL LUNG CARCINOMA, SARCOMA, NA, NA, LEUKEMIA, MYELOID, ACUTE, NEOPLASMS, SARCOMA, LEUKEMIA, NA, BREAST NEOPLASMS, NA, NA, LYMPHOMA, T-CELL, CUTANEOUS, NEOPLASMS, BREAST NEOPLASMS, URINARY BLADDER NEOPLASMS, GLIOMA, SARCOMA, CARCINOMA, OVARIAN NEOPLASMS, CARCINOMA, HEPATOCELLULAR, SMALL CELL LUNG CARCINOMA, LYMPH…	Inhibitor	0	0
CKAP5	BMX	-6.18	-3.08367	0.00596792	0.109908	2	-5.57066	0.610241	1.02186	1.00018	0.317816	0	1	1	0	2	2	28.57	100	ENSG00000175216	protein_coding	2598						0	0
FBL	RIOK3	-4.69	-3.05424	0.00637573	0.112433	2	-3.12329	1.56249	0.152449	0.194442	0.845926	0	1	1	0	2	2	28.57	100	ENSG00000105202	protein_coding	4038	nucleus					0	0
PLK1	TRAF2	9.84	3.85783	0.00065831	0.114691	4	-6.59064	3.24794	-2.14946	-1.46293	0.144256	0	1	1	0	2	5	57.14	80	ENSG00000166851	protein_coding	2264	cytoplasm, nucleus		Volasertib, Tak-960, Nms-1286937, Hmn-214, Cafusertib, Mk-1496, Bi-2536, Gsk-461364	LEUKEMIA, MYELOID, ACUTE, LEUKEMIA, NEOPLASMS, MYELODYSPLASTIC SYNDROMES, OVARIAN NEOPLASMS, NEOPLASMS, NEOPLASMS, NA, LEUKEMIA, MYELOID, ACUTE, NEOPLASMS, NEOPLASMS, NEOPLASMS, LYMPHOMA, NON-HODGKIN	Inhibitor	0	0
HAUS1	HSPB1	-6.74	-2.99865	0.00722081	0.117408	1	-4.43396	2.31034	0.482794	0.341493	0.732909	0	1	1	0	2	2	14.29	50	ENSG00000152240	protein_coding	1455	cytoplasm					0	0
PSMC2	MAP3K5	7.05	4.87324	9.08209e-05	0.118295	4	-5.31319	1.73915	-0.806983	-1.32396	0.186256	0	1	0	0	3	4	57.14	100	ENSG00000161057	protein_coding	5197	cytoplasm, nucleus					0	0
RSL1D1	RIOK3	-3.89	-2.9782	0.00755827	0.119309	2	-4.88658	-0.997174	0.4519	0.496218	0.620008	0	1	1	0	2	2	28.57	100	ENSG00000171490	protein_coding	4038						0	0
RACGAP1	FANCI	-5.66	-2.94229	0.00818779	0.12274	2	-4.9864	0.670053	-0.992742	-1.63121	0.103619	1	1	1	0	2	2	28.57	100	ENSG00000161800	protein_coding	4743	cytoplasm, nucleus					0	0
POLE	NSD1	6.29	3.77202	0.000823349	0.126904	4	-2.41485	3.87934	0.392775	0.622517	0.53395	1	1	1	0	2	5	57.14	80	ENSG00000177084	protein_coding	12892	nucleus, plasma membrane	Unknown, NA				0	0
POLE	PMS1	6.29	3.77202	0.000823349	0.126904	4	-2.41485	3.87934	0.0661925	0.199664	0.841843	1	1	1	0	2	5	57.14	80	ENSG00000177084	protein_coding	3417	nucleus, plasma membrane	Unknown, NA				0	0
POLE	ERCC6	6.29	3.77202	0.000823349	0.126904	4	-2.41485	3.87934	-0.569688	-1.09963	0.272143	0	1	1	0	2	5	57.14	80	ENSG00000177084	protein_coding	11026	nucleus, plasma membrane	Unknown, NA				0	0
HSPA8	HSPB1	4.74	2.87831	0.00943669	0.129163	4	-3.32194	1.4144	0.164332	0.163207	0.870436	1	1	1	0	2	5	57.14	80	ENSG00000109971	protein_coding	1455	nucleus, plasma membrane	oncogene, NA	Forigerimod		Inhibitor	0	0
PSMC5	HSPB1	-5.93	-2.82676	0.0105742	0.13464	2	-5.56175	0.3639	0.137812	0.106977	0.91486	0	1	1	0	2	2	28.57	100	ENSG00000087191	protein_coding	1455	cytoplasm, nucleus					0	0
KIF23	RNASEL	-5.39	-3.4915	0.00237547	0.135342	3	-3.35046	2.03742	-0.107766	-0.231251	0.817236	1	1	1	0	4	4	42.86	75	ENSG00000137807	protein_coding	4238	nucleus					0	0
PSMA7	HSPB1	-7.87	-2.81384	0.0108793	0.136057	2	-5.90537	1.96018	0.43594	0.297523	0.766219	0	1	1	0	2	2	28.57	100	ENSG00000101182	protein_coding	1455	nucleus		Oprozomib, Bortezomib, Carfilzomib, Ixazomib Citrate	NEOPLASMS, LEUKEMIA, LEUKEMIA, PROMYELOCYTIC, ACUTE, CARCINOMA, RENAL CELL, LYMPHOMA, FOLLICULAR, MULTIPLE MYELOMA, AMYLOIDOSIS, FAMILIAL, WALDENSTROM MACROGLOBULINEMIA, NEOPLASMS, MUSCULAR DYSTROPHIES, BREAST NEOPLASMS, LEUKEMIA, MYELOID, ACUTE, NEUROBLASTOMA, LYMPHOMA, BRONCHIOLITIS OBLITERANS, LYMPHOMA, LARGE B-CELL, DIFFUSE, MELANOMA, MESOTHELIOMA, GRAFT VS HOST DISEASE, LUNG NEOPLASMS, CARCI…	Inhibitor	0	0
EIF4E	MAPK14	-3.89	-2.80674	0.0110504	0.136843	2	-4.09911	-0.207093	-0.35844	-0.895696	0.370943	1	1	1	0	2	2	28.57	100	ENSG00000151247	protein_coding	4319	cytoplasm					0	0
EIF4E	PRKCB	-3.89	-2.80674	0.0110504	0.136843	2	-4.09911	-0.207093	1.11025	1.56355	0.118699	0	1	1	0	2	2	28.57	100	ENSG00000151247	protein_coding	7969	cytoplasm					0	0
UBC	TP73	-8.16	-3.23123	0.00730564	0.13728	2	-6.04005	2.12219	1.21677	1.04661	0.295897	0	1	1	0	2	2	28.57	100	ENSG00000150991	protein_coding	5188	cytoplasm, nucleus, plasma membrane					0	0
MED14	NCOA3	-8.03	-3.40843	0.00287234	0.14189	3	-3.44751	4.57966	-0.604317	-1.30293	0.193335	1	1	1	0	4	4	42.86	75	ENSG00000180182	protein_coding	7939	nucleus					0	0
PLK1	BIRC2	-8.45	-2.76075	0.0122234	0.142069	2	-7.10757	1.3375	-1.6512	-1.42334	0.155403	1	1	1	0	2	2	28.57	100	ENSG00000166851	protein_coding	4073	cytoplasm, nucleus		Volasertib, Tak-960, Nms-1286937, Hmn-214, Cafusertib, Mk-1496, Bi-2536, Gsk-461364	LEUKEMIA, MYELOID, ACUTE, LEUKEMIA, NEOPLASMS, MYELODYSPLASTIC SYNDROMES, OVARIAN NEOPLASMS, NEOPLASMS, NEOPLASMS, NA, LEUKEMIA, MYELOID, ACUTE, NEOPLASMS, NEOPLASMS, NEOPLASMS, LYMPHOMA, NON-HODGKIN	Inhibitor	0	0
PLK1	FANCI	-8.45	-2.76075	0.0122234	0.142069	2	-7.10757	1.3375	-1.13254	-1.25464	0.210329	1	1	1	0	2	2	28.57	100	ENSG00000166851	protein_coding	4743	cytoplasm, nucleus		Volasertib, Tak-960, Nms-1286937, Hmn-214, Cafusertib, Mk-1496, Bi-2536, Gsk-461364	LEUKEMIA, MYELOID, ACUTE, LEUKEMIA, NEOPLASMS, MYELODYSPLASTIC SYNDROMES, OVARIAN NEOPLASMS, NEOPLASMS, NEOPLASMS, NA, LEUKEMIA, MYELOID, ACUTE, NEOPLASMS, NEOPLASMS, NEOPLASMS, LYMPHOMA, NON-HODGKIN	Inhibitor	0	0
PLK1	MSH3	8.45	2.76075	0.0122234	0.142069	2	-7.10757	1.3375	-0.507468	-1.14024	0.254857	0	1	1	0	5	2	28.57	100	ENSG00000166851	protein_coding	4092	cytoplasm, nucleus		Volasertib, Tak-960, Nms-1286937, Hmn-214, Cafusertib, Mk-1496, Bi-2536, Gsk-461364	LEUKEMIA, MYELOID, ACUTE, LEUKEMIA, NEOPLASMS, MYELODYSPLASTIC SYNDROMES, OVARIAN NEOPLASMS, NEOPLASMS, NEOPLASMS, NA, LEUKEMIA, MYELOID, ACUTE, NEOPLASMS, NEOPLASMS, NEOPLASMS, LYMPHOMA, NON-HODGKIN	Inhibitor	0	0
SNW1	HSPB1	-4.3	-2.74923	0.0125354	0.143415	2	-4.70912	-0.407762	0.846346	0.72818	0.466921	0	1	1	0	2	2	28.57	100	ENSG00000100603	protein_coding	1455	nucleus					0	0
SNW1	FANCI	-4.3	-2.74923	0.0125354	0.143415	2	-4.70912	-0.407762	0.101836	0.152281	0.879041	0	1	1	0	2	2	28.57	100	ENSG00000100603	protein_coding	4743	nucleus					0	0
EIF1AX	RIOK3	-3.64	-2.74595	0.0126254	0.1438	2	-3.59704	0.0382301	1.00449	1.20932	0.227241	0	1	1	0	2	2	28.57	100	ENSG00000173674	protein_coding	4038						0	0
NDC80	FANCI	-5.43	-2.7171	0.0134457	0.147248	2	-3.41602	2.0093	-0.309688	-0.663401	0.507448	1	1	1	0	2	2	28.57	100	ENSG00000080986	protein_coding	4743	nucleus					0	0
NDC80	BIRC2	-5.43	-2.7171	0.0134457	0.147248	2	-3.41602	2.0093	-0.444688	-0.740917	0.45917	1	1	1	0	2	2	28.57	100	ENSG00000080986	protein_coding	4073	nucleus					0	0
NDC80	MSH3	5.43	2.7171	0.0134457	0.147248	2	-3.41602	2.0093	-0.0833611	-0.362175	0.717409	0	1	1	0	5	2	28.57	100	ENSG00000080986	protein_coding	4092	nucleus					0	0
PSMC5	AURKA	-6.5	-3.42956	0.00254983	0.147769	2	-6.14106	0.3639	-2.24989	-1.87269	0.0618266	1	1	1	0	2	2	28.57	100	ENSG00000087191	protein_coding	2248	cytoplasm, nucleus					0	0
POLR2G	FUS	6.35	3.6383	0.00116433	0.149825	2	-1.91179	4.43508	1.67353	1.71092	0.0878569	1	1	1	0	2	5	28.57	40	ENSG00000168002	protein_coding	5119	nucleus					0	0
POLR2G	ERCC6	6.35	3.6383	0.00116433	0.149825	2	-1.91179	4.43508	-0.260563	-0.549624	0.582878	0	1	1	0	2	5	28.57	40	ENSG00000168002	protein_coding	11026	nucleus					0	0
PSMB3	HSPB1	-4.94	-2.68582	0.0143924	0.151097	2	-3.14508	1.79342	0.386536	0.365245	0.715118	0	1	1	0	2	2	28.57	100	ENSG00000277791	protein_coding	1455	cytoplasm, Golgi apparatus, mitochondrion, nucleus		Carfilzomib, Oprozomib, Bortezomib, Ixazomib Citrate	CARCINOMA, RENAL CELL, NEOPLASMS, LEUKEMIA, MULTIPLE MYELOMA, PRECURSOR CELL LYMPHOBLASTIC LEUKEMIA-LYMPHOMA, LYMPHOMA, GRAFT VS HOST DISEASE, NEOPLASMS, LEUKEMIA, LEUKEMIA, PROMYELOCYTIC, ACUTE, CARCINOMA, RENAL CELL, LYMPHOMA, FOLLICULAR, MULTIPLE MYELOMA, AMYLOIDOSIS, FAMILIAL, WALDENSTROM MACROGLOBULINEMIA, NEOPLASMS, MUSCULAR DYSTROPHIES, BREAST NEOPLASMS, LEUKEMIA, MYELOID, ACUTE, NEUROBLAS…	Inhibitor	0	0
PSMA7	ABL1	8.05	3.60649	0.00126387	0.15603	4	-4.52691	3.52046	0.522481	0.482354	0.629813	1	1	1	0	2	5	57.14	80	ENSG00000101182	protein_coding	5766	nucleus		Oprozomib, Bortezomib, Carfilzomib, Ixazomib Citrate	NEOPLASMS, LEUKEMIA, LEUKEMIA, PROMYELOCYTIC, ACUTE, CARCINOMA, RENAL CELL, LYMPHOMA, FOLLICULAR, MULTIPLE MYELOMA, AMYLOIDOSIS, FAMILIAL, WALDENSTROM MACROGLOBULINEMIA, NEOPLASMS, MUSCULAR DYSTROPHIES, BREAST NEOPLASMS, LEUKEMIA, MYELOID, ACUTE, NEUROBLASTOMA, LYMPHOMA, BRONCHIOLITIS OBLITERANS, LYMPHOMA, LARGE B-CELL, DIFFUSE, MELANOMA, MESOTHELIOMA, GRAFT VS HOST DISEASE, LUNG NEOPLASMS, CARCI…	Inhibitor	0	0
POLR2C	ERCC6	5.57	3.5867	0.00132992	0.160042	5	-3.41503	2.15428	-1.30978	-2.41667	0.0161015	0	1	1	0	2	5	71.43	100	ENSG00000102978	protein_coding	11026	cytoplasm, nucleus					0	0
POLR2C	CDK12	5.57	3.5867	0.00132992	0.160042	5	-3.41503	2.15428	0.702252	0.901564	0.367821	1	1	1	0	2	5	71.43	100	ENSG00000102978	protein_coding	8336	cytoplasm, nucleus					0	0
POLR2C	FUS	5.57	3.5867	0.00132992	0.160042	5	-3.41503	2.15428	0.612649	0.542438	0.587813	1	1	1	0	2	5	71.43	100	ENSG00000102978	protein_coding	5119	cytoplasm, nucleus					0	0
SUPT6H	MSH3	4.36	2.589	0.0177396	0.163778	2	-4.36847	-0.0114777	-0.130915	-0.461087	0.644982	0	1	1	0	5	2	28.57	100	ENSG00000109111	protein_coding	4092	nucleus					0	0
SNRNP200	WDHD1	-5.55	-3.24247	0.0039426	0.164103	2	-5.15078	0.401887	-0.983994	-1.70539	0.0888825	1	1	1	0	2	2	28.57	100	ENSG00000144028	protein_coding	5996	nucleus					0	0
SNRNP200	STAG3	-5.55	-3.24247	0.0039426	0.164103	2	-5.15078	0.401887	-1.67421	-2.33779	0.0198811	1	1	1	0	2	2	28.57	100	ENSG00000144028	protein_coding	4450	nucleus					0	0
CLTC	BMX	-3.7	-2.58185	0.0180139	0.164762	2	-4.7824	-1.07838	1.13947	0.926709	0.354626	0	1	1	0	2	2	28.57	100	ENSG00000141367	protein_coding	2598	mitochondrion, plasma membrane	oncogene, NA				0	0
GAK	APC	-8.79	-4.19957	0.000246236	0.164926	3	-8.88016	-0.0865168	0.863546	1.99561	0.0466409	0	1	1	0	3	3	42.86	100	ENSG00000178950	protein_coding	10701	Golgi apparatus					0	0
OIP5	AURKA	-4.76	-3.12439	0.0051779	0.177215	2	-2.89216	1.86314	-0.0631011	-0.0849999	0.932303	1	1	1	0	2	2	28.57	100	ENSG00000104147	protein_coding	2248	cytoplasm, nucleus					0	0
OIP5	HMMR	-4.76	-3.12439	0.0051779	0.177215	2	-2.89216	1.86314	-0.530196	-1.03058	0.303346	1	1	1	0	2	2	28.57	100	ENSG00000104147	protein_coding	3102	cytoplasm, nucleus					0	0
CCT3	BRD2	4.6	3.2323	0.00521726	0.178433	3	-3.00723	1.58863	-0.372171	-1.17556	0.240455	0	1	1	0	3	4	42.86	75	ENSG00000163468	protein_coding	4894	cytoplasm, plasma membrane					0	0
ATF4	MAPKAPK3	9.18	2.11728	0.0497911	0.179749	2	-8.21469	0.964442	0.780062	2.55197	0.0110754	1	1	1	0	4	3	28.57	66.67	ENSG00000128272	protein_coding	2988	cytoplasm, nucleus					0	0
PABPN1	RB1	-5.01	-3.07315	0.00582399	0.183574	2	-5.10721	-0.0924584	-0.0668886	-0.138498	0.889915	1	1	1	0	2	2	28.57	100	ENSG00000100836	protein_coding	4840	cytoplasm, nucleus					0	0
PSMC2	HSPB1	-6.86	-2.42939	0.0249051	0.18751	2	-6.07768	0.782549	0.307672	0.208893	0.834636	0	1	1	0	2	2	28.57	100	ENSG00000161057	protein_coding	1455	cytoplasm, nucleus					0	0
MAD2L1	BIRC2	-4.65	-2.42329	0.0252263	0.188494	2	-2.37504	2.27826	-0.0521584	-0.061434	0.951044	1	1	1	0	2	2	28.57	100	ENSG00000164109	protein_coding	4073	cytoplasm, nucleus					0	0
RAN	RANBP9	-4.8	-3.02765	0.00646246	0.189541	2	-5.39637	-0.595518	0.526673	0.400885	0.688715	0	1	1	0	2	2	28.57	100	ENSG00000132341	protein_coding	3113	cytoplasm, nucleus					0	0
VCP	HNF1A	-6.33	-2.73141	0.0183901	0.190522	4	-3.58773	2.74646	0.411926	1.18973	0.234843	0	1	1	0	5	5	57.14	80	ENSG00000165280	protein_coding	3442	cytoplasm, endoplasmic reticulum, nucleus					0	0
DARS	MAP3K7	4.85	3.09833	0.00691094	0.190889	3	-3.86877	0.979811	0.591526	0.805523	0.420988	1	1	1	0	3	4	42.86	75	ENSG00000115866	protein_coding	4911	cytoplasm					0	0
CDC45	FANCI	-5.58	-2.40703	0.0261022	0.191152	2	-2.91157	2.66843	-0.320272	-0.857597	0.391619	1	1	1	0	2	2	28.57	100	ENSG00000093009	protein_coding	4743	cytoplasm, nucleus					0	0
CDC45	MSH3	5.58	2.40703	0.0261022	0.191152	2	-2.91157	2.66843	0.0516112	0.280174	0.779486	1	1	1	0	5	2	28.57	100	ENSG00000093009	protein_coding	4092	cytoplasm, nucleus					0	0
POLR2A	BRD2	6.18	3.06198	0.00745697	0.194523	3	-3.12329	3.05265	0.787417	1.72198	0.0858321	1	1	1	0	3	4	42.86	75	ENSG00000181222	protein_coding	4894	nucleus					0	0
PWP2	RIOK3	-3.84	-2.37856	0.0277042	0.195917	2	-4.08287	-0.238742	0.49123	0.73607	0.462111	0	1	1	0	2	2	28.57	100	ENSG00000241945	protein_coding	4038						0	0
RAD17	FANCI	-3.74	-2.34767	0.0295452	0.201252	1	-3.0716	0.665696	-0.477492	-0.895016	0.371306	1	1	1	0	2	2	14.29	50	ENSG00000152942	protein_coding	4743	nucleus					0	0
RAD17	MSH3	3.74	2.34767	0.0295452	0.201252	1	-3.0716	0.665696	-0.0288464	-0.109598	0.912782	0	1	1	0	5	2	14.29	50	ENSG00000152942	protein_coding	4092	nucleus					0	0
RPA2	FANCI	-4.83	-2.33084	0.0305947	0.204233	2	-3.64616	1.18381	-0.306218	-0.471512	0.637527	1	1	1	0	2	2	28.57	100	ENSG00000117748	protein_coding	4743	nucleus					0	0
RPA2	MSH3	4.83	2.33084	0.0305947	0.204233	2	-3.64616	1.18381	0.20284	0.633839	0.526541	1	1	1	0	5	2	28.57	100	ENSG00000117748	protein_coding	4092	nucleus					0	0
RPA2	HSPB1	-4.83	-2.33084	0.0305947	0.204233	2	-3.64616	1.18381	-0.440682	-0.390147	0.696632	1	1	1	0	2	2	28.57	100	ENSG00000117748	protein_coding	1455	nucleus					0	0
POLR2A	TAF15	-6.27	-2.89623	0.00870815	0.208263	2	-4.06485	2.20854	0.807703	0.936043	0.349805	0	1	1	0	2	2	28.57	100	ENSG00000181222	protein_coding	2191	nucleus					0	0
POLR2A	WDHD1	-6.27	-2.89623	0.00870815	0.208263	2	-4.06485	2.20854	-0.137751	-0.244076	0.807295	1	1	1	0	2	2	28.57	100	ENSG00000181222	protein_coding	5996	nucleus					0	0
RAD21	AURKA	-5.37	-2.87665	0.00910104	0.211214	2	-5.13217	0.234366	-0.987487	-1.13121	0.25863	1	1	1	0	2	2	28.57	100	ENSG00000164754	protein_coding	2248		suppressor, NA				0	0
RAD21	STAG3	-5.37	-2.87665	0.00910104	0.211214	2	-5.13217	0.234366	-0.163206	-0.290685	0.77144	1	1	1	0	2	2	28.57	100	ENSG00000164754	protein_coding	4450		suppressor, NA				0	0
RAD21	MASTL	-5.37	-2.87665	0.00910104	0.211214	2	-5.13217	0.234366	0.743855	1.26247	0.2075	0	1	1	0	2	2	28.57	100	ENSG00000164754	protein_coding	3623		suppressor, NA				0	0
RAD21	RB1	-5.37	-2.87665	0.00910104	0.211214	2	-5.13217	0.234366	-1.43469	-3.07558	0.00224245	1	1	1	0	2	2	28.57	100	ENSG00000164754	protein_coding	4840		suppressor, NA				0	0
TPX2	FANCI	-3.75	-2.27748	0.0341569	0.214064	2	-2.37425	1.37869	0.2966	0.83523	0.404077	0	1	1	0	2	2	28.57	100	ENSG00000088325	protein_coding	4743	cytoplasm, nucleus	Unknown, NA				0	0
RRM1	MSH3	3.22	2.26728	0.0348796	0.21601	2	-2.63687	0.583701	-0.0536903	-0.270939	0.786575	0	1	1	0	5	2	28.57	100	ENSG00000167325	protein_coding	4092	cytoplasm		Gallium Nitrate, Clofarabine, Gemcitabine, Cladribine, Fludarabine, Tezacitabine, Fludarabine Phosphate, Clofarabine, Hydroxyurea, Hydroxyurea	CYSTIC FIBROSIS, MYELODYSPLASTIC SYNDROMES, LEUKEMIA, LYMPHOMA, NON-HODGKIN, MULTIPLE MYELOMA, HISTIOCYTOSIS, LEUKEMIA, LYMPHOCYTIC, CHRONIC, B-CELL, LYMPHOMA, FOLLICULAR, LEUKEMIA, MYELOID, ACUTE, PRECURSOR CELL LYMPHOBLASTIC LEUKEMIA-LYMPHOMA, NEOPLASMS, LEUKEMIA, MYELOMONOCYTIC, CHRONIC, THYROID NEOPLASMS, MESOTHELIOMA, SMALL CELL LUNG CARCINOMA, NEOPLASMS, CHOLANGIOCARCINOMA, PANCREATIC NEOPL…	Inhibitor	1	0
PSMA5	HSPB1	-5.2	-2.24647	0.0363985	0.220053	2	-2.16768	3.03602	0.466331	0.618042	0.536893	0	1	1	0	2	2	28.57	100	ENSG00000143106	protein_coding	1455	cytoplasm, nucleus		Ixazomib Citrate, Bortezomib, Oprozomib, Carfilzomib	NEOPLASMS, AMYLOIDOSIS, FAMILIAL, MULTIPLE MYELOMA, GLIOBLASTOMA, GRAFT VS HOST DISEASE, LYMPHOMA, LEUKEMIA, LEUKEMIA, PROMYELOCYTIC, ACUTE, CARCINOMA, RENAL CELL, LYMPHOMA, FOLLICULAR, MULTIPLE MYELOMA, AMYLOIDOSIS, FAMILIAL, WALDENSTROM MACROGLOBULINEMIA, NEOPLASMS, MUSCULAR DYSTROPHIES, BREAST NEOPLASMS, LEUKEMIA, MYELOID, ACUTE, NEUROBLASTOMA, LYMPHOMA, BRONCHIOLITIS OBLITERANS, LYMPHOMA, LAR…	Inhibitor	0	0
TAF1	MGA	-6.86	-2.72744	0.0136189	0.225443	3	-5.22802	1.62824	-0.761242	-1.35133	0.17734	1	1	1	0	4	4	42.86	75	ENSG00000147133	protein_coding	14439		oncogene, NA				0	0
POLR2A	NCOA3	-5.33	-2.69481	0.0141563	0.226196	3	-3.12329	2.20854	-0.0975707	-0.31655	0.751747	1	1	1	0	4	4	42.86	75	ENSG00000181222	protein_coding	7939	nucleus					0	0
BRIX1	RIOK3	-4.17	-2.21076	0.0391467	0.227218	2	-3.46316	0.707604	0.125224	0.252034	0.801142	0	1	1	0	2	2	28.57	100	ENSG00000113460	protein_coding	4038	nucleus					0	0
RBX1	MAP3K7	3.36	2.77769	0.0134556	0.227534	4	-2.93356	0.424069	0.481642	1.00705	0.314509	1	1	1	0	3	4	57.14	100	ENSG00000100387	protein_coding	4911						0	0
VCP	HSPB1	-5.04	-2.17482	0.0421028	0.234734	2	-3.81847	1.21827	-0.169575	-0.130345	0.896358	1	1	1	0	2	2	28.57	100	ENSG00000165280	protein_coding	1455	cytoplasm, endoplasmic reticulum, nucleus					0	0
MIS18A	AURKA	-4.91	-2.71307	0.0131139	0.237015	2	-2.76224	2.14913	0.886281	1.251	0.211654	0	1	1	0	2	2	28.57	100	ENSG00000159055	protein_coding	2248	cytoplasm, nucleus					0	0
CKAP5	PCM1	6.39	2.65936	0.0157519	0.237724	3	-4.73487	1.65914	0.613657	1.55699	0.12025	1	1	1	0	3	4	42.86	75	ENSG00000175216	protein_coding	8287						0	0
GAK	BMX	-5.51	-2.15822	0.0435356	0.238314	2	-7.06003	-1.54816	0.867814	0.784589	0.43315	0	1	1	0	2	2	28.57	100	ENSG00000178950	protein_coding	2598	Golgi apparatus					0	0
GAK	BIRC2	-5.51	-2.15822	0.0435356	0.238314	2	-7.06003	-1.54816	-1.43145	-1.75557	0.0799125	1	1	1	0	2	2	28.57	100	ENSG00000178950	protein_coding	4073	Golgi apparatus					0	0
GAK	DGKB	-5.51	-2.15822	0.0435356	0.238314	2	-7.06003	-1.54816	0.196932	0.53045	0.596089	0	1	1	0	2	2	28.57	100	ENSG00000178950	protein_coding	6917	Golgi apparatus					0	0
BYSL	RIOK3	-2.93	-2.1567	0.0436698	0.238647	2	-3.947	-1.01539	0.170387	0.332745	0.739498	0	1	1	0	2	2	28.57	100	ENSG00000112578	protein_coding	4038	cytoplasm, nucleus					0	0
BCL2L1	PIK3R1	10.14	4.49917	0.0002168	0.239952	3	-5.71128	4.42914	0.421137	0.532024	0.594999	1	1	0	0	3	4	42.86	75	ENSG00000171552	protein_coding	7011	cytoplasm, mitochondrion	literature, Apoptosis	Obatoclax, Navitoclax	MYELODYSPLASTIC SYNDROMES, PRIMARY MYELOFIBROSIS, LEUKEMIA, LYMPHOCYTIC, CHRONIC, B-CELL, HODGKIN DISEASE, NEOPLASMS, SMALL CELL LUNG CARCINOMA, LEUKEMIA, LYMPHOCYTIC, CHRONIC, B-CELL	Inhibitor	0	1
VCP	FUS	6.9	3.26192	0.0030366	0.243664	4	-3.58773	3.31448	0.713987	0.549005	0.583303	1	1	1	0	2	5	57.14	80	ENSG00000165280	protein_coding	5119	cytoplasm, endoplasmic reticulum, nucleus					0	0
VCP	HDLBP	6.9	3.26192	0.0030366	0.243664	4	-3.58773	3.31448	-0.126655	-0.1498	0.880997	0	1	1	0	2	5	57.14	80	ENSG00000165280	protein_coding	6372	cytoplasm, endoplasmic reticulum, nucleus					0	0
MCM2	AURKA	-5.24	-2.67168	0.0143689	0.243776	2	-3.29461	1.95028	-0.0576494	-0.0577635	0.953965	1	1	1	0	2	2	28.57	100	ENSG00000073111	protein_coding	2248	cytoplasm, nucleus					0	0
MCM2	MASTL	-5.24	-2.67168	0.0143689	0.243776	2	-3.29461	1.95028	-0.0673056	-0.0998774	0.920491	1	1	1	0	2	2	28.57	100	ENSG00000073111	protein_coding	3623	cytoplasm, nucleus					0	0
MCM2	WDHD1	-5.24	-2.67168	0.0143689	0.243776	2	-3.29461	1.95028	-0.624908	-1.21606	0.224666	1	1	1	0	2	2	28.57	100	ENSG00000073111	protein_coding	5996	cytoplasm, nucleus					0	0
MCM2	RB1	-5.24	-2.67168	0.0143689	0.243776	2	-3.29461	1.95028	-0.185055	-0.343618	0.731311	1	1	1	0	2	2	28.57	100	ENSG00000073111	protein_coding	4840	cytoplasm, nucleus					0	0
EIF5	RNASEL	-3.45	-2.58249	0.0180368	0.245259	3	-3.24213	0.208134	0.497847	1.07269	0.284043	0	1	1	0	4	4	42.86	75	ENSG00000100664	protein_coding	4238	cytoplasm, plasma membrane					0	0
PSMC5	NCOA3	-4.28	-2.57775	0.0182208	0.246106	3	-3.91195	0.3639	-0.33124	-0.975576	0.329853	1	1	1	0	4	4	42.86	75	ENSG00000087191	protein_coding	7939	cytoplasm, nucleus					0	0
UBC	MMP1	8.62	3.96692	0.000552257	0.248622	2	-6.49558	2.12219	0.244279	0.235841	0.813674	1	1	1	0	5	2	28.57	100	ENSG00000150991	protein_coding	1970	cytoplasm, nucleus, plasma membrane					0	0
UBC	CSMD3	8.62	3.96692	0.000552257	0.248622	2	-6.49558	2.12219	0.170124	0.403311	0.686931	1	1	1	0	5	2	28.57	100	ENSG00000150991	protein_coding	13212	cytoplasm, nucleus, plasma membrane					0	0
UBC	SERPINB1	-8.62	-3.96692	0.000552257	0.248622	2	-6.49558	2.12219	-0.468653	-0.273499	0.784608	1	1	1	0	2	2	28.57	100	ENSG00000150991	protein_coding	2619	cytoplasm, nucleus, plasma membrane					0	0
PHB	PHF3	-4.59	-2.62329	0.0159802	0.251759	2	-2.81136	1.77401	0.00984115	0.025537	0.979639	0	1	1	0	2	2	28.57	100	ENSG00000167085	protein_coding	8233	cytoplasm, mitochondrion, nucleus, plasma membrane					0	0
PHB	RB1	-4.59	-2.62329	0.0159802	0.251759	2	-2.81136	1.77401	-0.0847427	-0.216507	0.828701	1	1	1	0	2	2	28.57	100	ENSG00000167085	protein_coding	4840	cytoplasm, mitochondrion, nucleus, plasma membrane					0	0
SMARCA4	RB1	-7.41	-2.61602	0.0162365	0.252964	2	-5.96281	1.44247	0.309533	0.351684	0.725257	0	1	1	0	2	2	28.57	100	ENSG00000127616	protein_coding	4840	nucleus	suppressor, NA				0	0
RACGAP1	TIAM1	-5.55	-3.65915	0.00104162	0.254605	3	-4.37639	1.17727	-0.597434	-1.11479	0.265597	1	1	1	0	3	3	42.86	100	ENSG00000161800	protein_coding	7200	cytoplasm, nucleus					0	0
NIPBL	STAG3	-4.59	-2.53288	0.0194566	0.266881	2	-5.99846	-1.40556	-0.229472	-0.432285	0.665763	1	1	1	0	2	2	28.57	100	ENSG00000164190	protein_coding	4450	nucleus					0	0
NIPBL	MLLT3	-4.59	-2.53288	0.0194566	0.266881	2	-5.99846	-1.40556	0.140603	0.437251	0.662161	0	1	1	0	2	2	28.57	100	ENSG00000164190	protein_coding	6772	nucleus					0	0
RAD17	FANCG	-3.97	-2.52131	0.0199496	0.268838	2	-3.29996	0.665696	0.925999	1.24597	0.213492	0	1	1	0	2	2	28.57	100	ENSG00000152942	protein_coding	2631	nucleus					0	0
RAD17	WDHD1	-3.97	-2.52131	0.0199496	0.268838	2	-3.29996	0.665696	-0.173417	-0.386574	0.699273	1	1	1	0	2	2	28.57	100	ENSG00000152942	protein_coding	5996	nucleus					0	0
MAD2L1	TP73	4.03	2.24891	0.0443335	0.269966	2	-0.851801	3.17545	-0.715814	-0.778097	0.436963	0	1	1	0	2	5	28.57	40	ENSG00000164109	protein_coding	5188	cytoplasm, nucleus					0	0
SMC3	STAG3	-4.23	-2.47467	0.0220575	0.276782	1	-4.08525	0.14493	-0.162735	-0.247783	0.804427	1	1	1	0	2	2	14.29	50	ENSG00000108055	protein_coding	4450	cytoplasm, nucleus	Unknown, NA				0	0
SMC3	AURKA	-4.23	-2.47467	0.0220575	0.276782	1	-4.08525	0.14493	-0.244976	-0.239554	0.810797	1	1	1	0	2	2	14.29	50	ENSG00000108055	protein_coding	2248	cytoplasm, nucleus	Unknown, NA				0	0
SMC3	WDHD1	-4.23	-2.47467	0.0220575	0.276782	1	-4.08525	0.14493	-0.686752	-1.30451	0.192795	1	1	1	0	2	2	14.29	50	ENSG00000108055	protein_coding	5996	cytoplasm, nucleus	Unknown, NA				0	0
SMC3	RANBP9	-4.23	-2.47467	0.0220575	0.276782	1	-4.08525	0.14493	-0.22532	-0.191289	0.848395	1	1	1	0	2	2	14.29	50	ENSG00000108055	protein_coding	3113	cytoplasm, nucleus	Unknown, NA				0	0
ANKRD11	NCOA3	-4.94	-2.40372	0.0263407	0.279596	3	-4.94877	-0.0101903	-0.377131	-1.98091	0.0482729	1	1	1	0	4	4	42.86	75	ENSG00000167522	protein_coding	7939	cytoplasm, nucleus, plasma membrane					0	0
RPS27A	ERBB2	3.77	2.40314	0.0287532	0.287379	4	-3.79054	-0.0180571	0.438703	0.745372	0.456476	1	1	1	0	3	4	57.14	100	ENSG00000143947	protein_coding	4930	cytoplasm, nucleus, plasma membrane					0	0
RPS27A	MAP3K7	3.77	2.40314	0.0287532	0.287379	4	-3.79054	-0.0180571	0.0887029	0.159923	0.873021	1	1	1	0	3	4	57.14	100	ENSG00000143947	protein_coding	4911	cytoplasm, nucleus, plasma membrane					0	0
KIF23	MASTL	-5.28	-2.39347	0.0262302	0.290918	2	-5.04383	0.231789	-0.463836	-0.971091	0.332079	1	1	1	0	2	2	28.57	100	ENSG00000137807	protein_coding	3623	nucleus					0	0
KIF23	AURKA	-5.28	-2.39347	0.0262302	0.290918	2	-5.04383	0.231789	0.01493	0.0210815	0.983191	0	1	1	0	2	2	28.57	100	ENSG00000137807	protein_coding	2248	nucleus					0	0
KIF23	HMMR	-5.28	-2.39347	0.0262302	0.290918	2	-5.04383	0.231789	-0.726619	-1.48259	0.138957	1	1	1	0	2	2	28.57	100	ENSG00000137807	protein_coding	3102	nucleus					0	0
KIF23	WDHD1	-5.28	-2.39347	0.0262302	0.290918	2	-5.04383	0.231789	-0.592054	-1.62592	0.104739	1	1	1	0	2	2	28.57	100	ENSG00000137807	protein_coding	5996	nucleus					0	0
KIF23	RB1	-5.28	-2.39347	0.0262302	0.290918	2	-5.04383	0.231789	-0.12068	-0.315781	0.75233	1	1	1	0	2	2	28.57	100	ENSG00000137807	protein_coding	4840	nucleus					0	0
MAPK1	HMMR	3.8	2.3372	0.029539	0.301039	2	-0.861308	2.93877	0.529303	0.91002	0.36335	1	1	1	0	2	5	28.57	40	ENSG00000100030	protein_coding	3102	cytoplasm, Golgi apparatus, mitochondrion, nucleus		Mk-8353, Ulixertinib, Purvalanol, Gdc-0994	NEOPLASMS, NA, NA, NEOPLASMS	Inhibitor	0	0
MAPK1	RB1	3.8	2.3372	0.029539	0.301039	2	-0.861308	2.93877	0.714802	1.58334	0.11412	1	1	1	0	2	5	28.57	40	ENSG00000100030	protein_coding	4840	cytoplasm, Golgi apparatus, mitochondrion, nucleus		Mk-8353, Ulixertinib, Purvalanol, Gdc-0994	NEOPLASMS, NA, NA, NEOPLASMS	Inhibitor	0	0
PSMD12	AURKA	-4.78	-2.32853	0.030082	0.30263	2	-4.70813	0.0710558	-1.04998	-0.915542	0.360448	1	1	1	0	2	2	28.57	100	ENSG00000197170	protein_coding	2248	cytoplasm					0	0
PSMA7	MLLT3	-7.3	-2.3258	0.0302546	0.303133	2	-5.3421	1.96018	0.0411926	0.0771477	0.938544	0	1	1	0	2	2	28.57	100	ENSG00000101182	protein_coding	6772	nucleus		Oprozomib, Bortezomib, Carfilzomib, Ixazomib Citrate	NEOPLASMS, LEUKEMIA, LEUKEMIA, PROMYELOCYTIC, ACUTE, CARCINOMA, RENAL CELL, LYMPHOMA, FOLLICULAR, MULTIPLE MYELOMA, AMYLOIDOSIS, FAMILIAL, WALDENSTROM MACROGLOBULINEMIA, NEOPLASMS, MUSCULAR DYSTROPHIES, BREAST NEOPLASMS, LEUKEMIA, MYELOID, ACUTE, NEUROBLASTOMA, LYMPHOMA, BRONCHIOLITIS OBLITERANS, LYMPHOMA, LARGE B-CELL, DIFFUSE, MELANOMA, MESOTHELIOMA, GRAFT VS HOST DISEASE, LUNG NEOPLASMS, CARCI…	Inhibitor	0	0
PSMA7	RB1	-7.3	-2.3258	0.0302546	0.303133	2	-5.3421	1.96018	-0.358427	-0.484034	0.628622	1	1	1	0	2	2	28.57	100	ENSG00000101182	protein_coding	4840	nucleus		Oprozomib, Bortezomib, Carfilzomib, Ixazomib Citrate	NEOPLASMS, LEUKEMIA, LEUKEMIA, PROMYELOCYTIC, ACUTE, CARCINOMA, RENAL CELL, LYMPHOMA, FOLLICULAR, MULTIPLE MYELOMA, AMYLOIDOSIS, FAMILIAL, WALDENSTROM MACROGLOBULINEMIA, NEOPLASMS, MUSCULAR DYSTROPHIES, BREAST NEOPLASMS, LEUKEMIA, MYELOID, ACUTE, NEUROBLASTOMA, LYMPHOMA, BRONCHIOLITIS OBLITERANS, LYMPHOMA, LARGE B-CELL, DIFFUSE, MELANOMA, MESOTHELIOMA, GRAFT VS HOST DISEASE, LUNG NEOPLASMS, CARCI…	Inhibitor	0	0
PSMA7	AURKA	-7.3	-2.3258	0.0302546	0.303133	2	-5.3421	1.96018	-1.04483	-0.761815	0.446611	1	1	1	0	2	2	28.57	100	ENSG00000101182	protein_coding	2248	nucleus		Oprozomib, Bortezomib, Carfilzomib, Ixazomib Citrate	NEOPLASMS, LEUKEMIA, LEUKEMIA, PROMYELOCYTIC, ACUTE, CARCINOMA, RENAL CELL, LYMPHOMA, FOLLICULAR, MULTIPLE MYELOMA, AMYLOIDOSIS, FAMILIAL, WALDENSTROM MACROGLOBULINEMIA, NEOPLASMS, MUSCULAR DYSTROPHIES, BREAST NEOPLASMS, LEUKEMIA, MYELOID, ACUTE, NEUROBLASTOMA, LYMPHOMA, BRONCHIOLITIS OBLITERANS, LYMPHOMA, LARGE B-CELL, DIFFUSE, MELANOMA, MESOTHELIOMA, GRAFT VS HOST DISEASE, LUNG NEOPLASMS, CARCI…	Inhibitor	0	0
CDC45	RB1	-5.55	-2.32297	0.030435	0.303656	2	-2.88484	2.66843	-1.20743	-3.7371	0.000212713	1	1	1	0	2	2	28.57	100	ENSG00000093009	protein_coding	4840	cytoplasm, nucleus					0	0
CDC45	WDHD1	-5.55	-2.32297	0.030435	0.303656	2	-2.88484	2.66843	-0.547996	-1.75146	0.0806177	1	1	1	0	2	2	28.57	100	ENSG00000093009	protein_coding	5996	cytoplasm, nucleus					0	0
CDC45	AURKA	-5.55	-2.32297	0.030435	0.303656	2	-2.88484	2.66843	1.04457	1.72192	0.0858423	0	1	1	0	2	2	28.57	100	ENSG00000093009	protein_coding	2248	cytoplasm, nucleus					0	0
SMARCA4	TRIM33	-10.82	-4.75727	0.000248754	0.306978	4	-5.42212	5.39366	0.158203	0.316766	0.751584	0	1	1	0	5	5	57.14	80	ENSG00000127616	protein_coding	8339	nucleus	suppressor, NA				0	0
POLR2G	MLLT3	-2.8	-2.26615	0.0342672	0.314376	2	-3.53485	-0.732572	0.232827	0.651261	0.515245	0	1	1	0	2	2	28.57	100	ENSG00000168002	protein_coding	6772	nucleus					0	0
POLR2G	TAF15	-2.8	-2.26615	0.0342672	0.314376	2	-3.53485	-0.732572	0.309588	0.426627	0.669876	0	1	1	0	2	2	28.57	100	ENSG00000168002	protein_coding	2191	nucleus					0	0
UBC	WDHD1	7.38	2.2504	0.0354048	0.317436	3	-4.27736	3.0994	0.375567	0.535585	0.592537	1	1	1	0	2	5	42.86	60	ENSG00000150991	protein_coding	5996	cytoplasm, nucleus, plasma membrane					0	0
UBC	RANBP9	7.38	2.2504	0.0354048	0.317436	3	-4.27736	3.0994	-1.6697	-1.06747	0.286389	0	1	1	0	2	5	42.86	60	ENSG00000150991	protein_coding	3113	cytoplasm, nucleus, plasma membrane					0	0
UBC	GRK6	7.38	2.2504	0.0354048	0.317436	3	-4.27736	3.0994	1.26919	1.13909	0.255336	1	1	1	0	2	5	42.86	60	ENSG00000150991	protein_coding	2939	cytoplasm, nucleus, plasma membrane					0	0
UBC	TAF15	7.38	2.2504	0.0354048	0.317436	3	-4.27736	3.0994	1.80339	1.68564	0.0926294	1	1	1	0	2	5	42.86	60	ENSG00000150991	protein_coding	2191	cytoplasm, nucleus, plasma membrane					0	0
UBC	AURKA	7.38	2.2504	0.0354048	0.317436	3	-4.27736	3.0994	1.25568	0.924329	0.355862	1	1	1	0	2	5	42.86	60	ENSG00000150991	protein_coding	2248	cytoplasm, nucleus, plasma membrane					0	0
UBC	RB1	7.38	2.2504	0.0354048	0.317436	3	-4.27736	3.0994	0.149372	0.203534	0.838819	1	1	1	0	2	5	42.86	60	ENSG00000150991	protein_coding	4840	cytoplasm, nucleus, plasma membrane					0	0
UBC	NIN	7.38	2.2504	0.0354048	0.317436	3	-4.27736	3.0994	0.163207	0.245465	0.80622	1	1	1	0	2	5	42.86	60	ENSG00000150991	protein_coding	10293	cytoplasm, nucleus, plasma membrane					0	0
UBC	FANCG	7.38	2.2504	0.0354048	0.317436	3	-4.27736	3.0994	0.889182	0.764361	0.445094	1	1	1	0	2	5	42.86	60	ENSG00000150991	protein_coding	2631	cytoplasm, nucleus, plasma membrane					0	0
UBC	MASTL	7.38	2.2504	0.0354048	0.317436	3	-4.27736	3.0994	0.0895607	0.097537	0.922348	1	1	1	0	2	5	42.86	60	ENSG00000150991	protein_coding	3623	cytoplasm, nucleus, plasma membrane					0	0
UBC	LRP6	7.38	2.2504	0.0354048	0.317436	3	-4.27736	3.0994	0.943363	1.2459	0.213515	1	1	1	0	2	5	42.86	60	ENSG00000150991	protein_coding	10020	cytoplasm, nucleus, plasma membrane					0	0
UBC	HMMR	7.38	2.2504	0.0354048	0.317436	3	-4.27736	3.0994	2.11921	2.25982	0.0243594	1	1	1	0	2	5	42.86	60	ENSG00000150991	protein_coding	3102	cytoplasm, nucleus, plasma membrane					0	0
UBC	PHF3	7.38	2.2504	0.0354048	0.317436	3	-4.27736	3.0994	-0.151549	-0.209751	0.833967	0	1	1	0	2	5	42.86	60	ENSG00000150991	protein_coding	8233	cytoplasm, nucleus, plasma membrane					0	0
CDC27	AURKA	-4.2	-2.24518	0.0357894	0.318459	2	-2.09578	2.10516	0.185938	0.344449	0.730686	0	1	1	0	2	2	28.57	100	ENSG00000004897	protein_coding	2248	cytoplasm, nucleus	Unknown, NA				0	0
CDC27	RB1	-4.2	-2.24518	0.0357894	0.318459	2	-2.09578	2.10516	-0.708504	-2.44944	0.0147278	1	1	1	0	2	2	28.57	100	ENSG00000004897	protein_coding	4840	cytoplasm, nucleus	Unknown, NA				0	0
SMC5	WDHD1	-3.97	-2.24402	0.0358759	0.318689	1	-3.64358	0.323453	-0.416104	-0.973206	0.331028	1	1	1	0	2	2	14.29	50	ENSG00000198887	protein_coding	5996	nucleus					0	0
SMC5	STAG3	-3.97	-2.24402	0.0358759	0.318689	1	-3.64358	0.323453	-1.08624	-2.04862	0.0411387	1	1	1	0	2	2	14.29	50	ENSG00000198887	protein_coding	4450	nucleus					0	0
RPS3A	AURKA	-4.77	-2.20964	0.0385121	0.325566	2	-3.40136	1.37156	1.03769	0.946416	0.344497	0	1	1	0	2	2	28.57	100	ENSG00000145425	protein_coding	2248	cytoplasm, nucleus					0	0
PHB2	RAPGEF2	3.25	2.20601	0.042366	0.327858	2	-2.42059	0.826517	-0.139259	-0.594629	0.552421	0	1	1	0	3	4	28.57	50	ENSG00000215021	protein_coding	6949	cytoplasm, mitochondrion, nucleus					0	0
PHB2	ERBB2	3.25	2.20601	0.042366	0.327858	2	-2.42059	0.826517	-0.057372	-0.131465	0.895472	0	1	1	0	3	4	28.57	50	ENSG00000215021	protein_coding	4930	cytoplasm, mitochondrion, nucleus					0	0
RACGAP1	LMNA	6.27	2.85385	0.00735524	0.329591	3	-3.71172	2.55831	-0.0536217	-0.0859149	0.931576	0	1	1	0	2	5	42.86	60	ENSG00000161800	protein_coding	3190	cytoplasm, nucleus					0	0
CDK4	RB1	3.65	2.18959	0.0401303	0.329687	2	-1.0249	2.62842	0.778099	2.02021	0.0440147	1	1	1	0	2	5	28.57	40	ENSG00000135446	protein_coding	4840	nucleus	oncogene, NA	Rg-547, Palbociclib, Alvocidib, Riviciclib, Milciclib, Rgb-286638, Voruciclib, Ribociclib, Ribociclib, Abemaciclib, Ag-24322, Palbociclib, (7s)-Hydroxyl-Staurosporine, G1t28-1	NEOPLASMS, NA, LEUKEMIA, LYMPHOCYTIC, CHRONIC, B-CELL, PROSTATIC NEOPLASMS, NEOPLASMS, LYMPHOMA, MULTIPLE MYELOMA, HEMATOLOGIC NEOPLASMS, NA, CARCINOMA, NA, NA, LYMPHOMA, LIPOSARCOMA, CARCINOMA, HEPATOCELLULAR, LIVER DISEASES, BREAST NEOPLASMS, NEOPLASMS, CARCINOMA, SQUAMOUS CELL, MELANOMA, GLIOBLASTOMA, NA, LIPOSARCOMA, LYMPHOMA, NEOPLASMS, BREAST NEOPLASMS, LYMPHOMA, MANTLE-CELL, CARCINOMA, NON…	Inhibitor	0	1
CDK4	AURKA	3.65	2.18959	0.0401303	0.329687	2	-1.0249	2.62842	-0.0214698	-0.0299344	0.976134	0	1	1	0	2	5	28.57	40	ENSG00000135446	protein_coding	2248	nucleus	oncogene, NA	Rg-547, Palbociclib, Alvocidib, Riviciclib, Milciclib, Rgb-286638, Voruciclib, Ribociclib, Ribociclib, Abemaciclib, Ag-24322, Palbociclib, (7s)-Hydroxyl-Staurosporine, G1t28-1	NEOPLASMS, NA, LEUKEMIA, LYMPHOCYTIC, CHRONIC, B-CELL, PROSTATIC NEOPLASMS, NEOPLASMS, LYMPHOMA, MULTIPLE MYELOMA, HEMATOLOGIC NEOPLASMS, NA, CARCINOMA, NA, NA, LYMPHOMA, LIPOSARCOMA, CARCINOMA, HEPATOCELLULAR, LIVER DISEASES, BREAST NEOPLASMS, NEOPLASMS, CARCINOMA, SQUAMOUS CELL, MELANOMA, GLIOBLASTOMA, NA, LIPOSARCOMA, LYMPHOMA, NEOPLASMS, BREAST NEOPLASMS, LYMPHOMA, MANTLE-CELL, CARCINOMA, NON…	Inhibitor	0	1
PSMA5	AURKA	-5.18	-2.18199	0.0407595	0.331272	2	-2.13955	3.03602	0.305732	0.432526	0.665588	0	1	1	0	2	2	28.57	100	ENSG00000143106	protein_coding	2248	cytoplasm, nucleus		Ixazomib Citrate, Bortezomib, Oprozomib, Carfilzomib	NEOPLASMS, AMYLOIDOSIS, FAMILIAL, MULTIPLE MYELOMA, GLIOBLASTOMA, GRAFT VS HOST DISEASE, LYMPHOMA, LEUKEMIA, LEUKEMIA, PROMYELOCYTIC, ACUTE, CARCINOMA, RENAL CELL, LYMPHOMA, FOLLICULAR, MULTIPLE MYELOMA, AMYLOIDOSIS, FAMILIAL, WALDENSTROM MACROGLOBULINEMIA, NEOPLASMS, MUSCULAR DYSTROPHIES, BREAST NEOPLASMS, LEUKEMIA, MYELOID, ACUTE, NEUROBLASTOMA, LYMPHOMA, BRONCHIOLITIS OBLITERANS, LYMPHOMA, LAR…	Inhibitor	0	0
SMARCA4	BRD2	9.6	2.18899	0.0437868	0.331635	3	-4.81805	4.78564	-0.730825	-1.06978	0.285353	0	1	1	0	3	4	42.86	75	ENSG00000127616	protein_coding	4894	nucleus	suppressor, NA				0	0
CKAP5	AURKA	-5.35	-2.16628	0.0420888	0.334589	2	-4.73487	0.610241	0.78677	0.821878	0.411627	0	1	1	0	2	2	28.57	100	ENSG00000175216	protein_coding	2248						0	0
SLBP	AURKA	-3.3	-2.15988	0.0426411	0.335956	2	-3.04942	0.251707	0.194697	0.30482	0.760659	0	1	1	0	2	2	28.57	100	ENSG00000163950	protein_coding	2248	cytoplasm, nucleus					0	0
HSPA9	MAP3K7	3.56	2.16273	0.0460661	0.337548	2	-2.47466	1.08953	0.20302	0.373523	0.708953	1	1	1	0	3	4	28.57	50	ENSG00000113013	protein_coding	4911	cytoplasm, mitochondrion					0	0
SNRNP200	LRRK1	-3.7	-2.14144	0.0450991	0.338135	3	-3.29461	0.401887	-0.812521	-1.20603	0.228505	1	1	1	0	4	4	42.86	75	ENSG00000144028	protein_coding	11632	nucleus					0	0
E2F3	RB1	-3.19	-2.14773	0.0437086	0.33858	2	-2.33305	0.85979	-1.37075	-4.55601	6.89752e-06	1	1	1	0	2	2	28.57	100	ENSG00000112242	protein_coding	4840	cytoplasm, nucleus	Unknown, NA				0	0
POLR2A	CDK12	6.91	2.99087	0.00593844	0.339001	3	-2.79868	4.11126	1.90453	2.3786	0.0178382	1	1	1	0	2	5	42.86	60	ENSG00000181222	protein_coding	8336	nucleus					0	0
POLR2A	ERCC6	6.91	2.99087	0.00593844	0.339001	3	-2.79868	4.11126	-1.35266	-2.41364	0.0162338	0	1	1	0	2	5	42.86	60	ENSG00000181222	protein_coding	11026	nucleus					0	0
POLR2A	FUS	6.91	2.99087	0.00593844	0.339001	3	-2.79868	4.11126	0.546821	0.468182	0.639904	1	1	1	0	2	5	42.86	60	ENSG00000181222	protein_coding	5119	nucleus					0	0
POLR2A	ABL1	6.91	2.99087	0.00593844	0.339001	3	-2.79868	4.11126	0.506866	0.587023	0.557513	1	1	1	0	2	5	42.86	60	ENSG00000181222	protein_coding	5766	nucleus					0	0
SMARCA4	SMG1	-8.54	-3.15167	0.00385168	0.339472	3	-5.42212	3.11405	-0.422764	-0.530273	0.596211	1	1	1	0	3	3	42.86	100	ENSG00000127616	protein_coding	16115	nucleus	suppressor, NA				0	0
MCM2	MECOM	4.31	2.13002	0.046143	0.34087	2	-2.25126	2.05842	-0.103215	-0.362583	0.717104	0	1	1	0	3	4	28.57	50	ENSG00000073111	protein_coding	5732	cytoplasm, nucleus					0	0
PLK4	PCM1	3.91	2.15937	0.0442275	0.342849	1	-1.6359	2.26994	0.16285	0.521023	0.602633	1	1	1	0	3	4	14.29	25	ENSG00000142731	protein_coding	8287			Rg-1530	NEOPLASMS	Inhibitor	0	0
UBE2I	FUS	5.34	2.97919	0.00610988	0.343489	4	-3.67012	1.67162	-0.738019	-0.731337	0.464993	0	1	1	0	2	5	57.14	80	ENSG00000103275	protein_coding	5119	cytoplasm, nucleus					0	0
CCT7	FUS	5.45	2.9677	0.00628306	0.347918	2	-1.93873	3.50739	0.1435	0.208257	0.835132	1	1	1	0	2	5	28.57	40	ENSG00000135624	protein_coding	5119	cytoplasm, mitochondrion					0	0
CCT7	CDK12	5.45	2.9677	0.00628306	0.347918	2	-1.93873	3.50739	-0.117217	-0.24651	0.805412	0	1	1	0	2	5	28.57	40	ENSG00000135624	protein_coding	8336	cytoplasm, mitochondrion					0	0
NDC80	WDHD1	-4.76	-2.09769	0.0483648	0.349786	2	-2.75392	2.0093	-0.219353	-0.55918	0.576346	1	1	1	0	2	2	28.57	100	ENSG00000080986	protein_coding	5996	nucleus					0	0
NDC80	RB1	-4.76	-2.09769	0.0483648	0.349786	2	-2.75392	2.0093	-0.063553	-0.154793	0.877061	1	1	1	0	2	2	28.57	100	ENSG00000080986	protein_coding	4840	nucleus					0	0
NDC80	AURKA	-4.76	-2.09769	0.0483648	0.349786	2	-2.75392	2.0093	-0.303186	-0.398603	0.690394	1	1	1	0	2	2	28.57	100	ENSG00000080986	protein_coding	2248	nucleus					0	0
NDC80	HMMR	-4.76	-2.09769	0.0483648	0.349786	2	-2.75392	2.0093	-0.555918	-1.05452	0.29227	1	1	1	0	2	2	28.57	100	ENSG00000080986	protein_coding	3102	nucleus					0	0
XRCC6	ABL1	6.33	2.95025	0.00655511	0.354667	3	-4.25755	2.07268	0.963924	1.02631	0.305356	1	1	1	0	2	5	42.86	60	ENSG00000196419	protein_coding	5766	nucleus					0	0
XRCC6	PMS1	6.33	2.95025	0.00655511	0.354667	3	-4.25755	2.07268	-0.549259	-1.40225	0.161602	0	1	1	0	2	5	42.86	60	ENSG00000196419	protein_coding	3417	nucleus					0	0
SMC3	SMG1	-5.77	-2.96387	0.00614782	0.384852	2	-3.76876	2.00034	-0.488322	-0.97766	0.328822	1	1	1	0	3	3	28.57	66.67	ENSG00000108055	protein_coding	16115	cytoplasm, nucleus	Unknown, NA				0	0
SMC3	APC	-5.77	-2.96387	0.00614782	0.384852	2	-3.76876	2.00034	0.730631	1.70941	0.0881365	0	1	1	0	3	3	28.57	66.67	ENSG00000108055	protein_coding	10701	cytoplasm, nucleus	Unknown, NA				0	0
ORC1	NSD1	4.8	2.86746	0.00800534	0.386715	3	-2.3083	2.49513	0.20646	0.65665	0.511776	1	1	1	0	2	5	42.86	60	ENSG00000085840	protein_coding	12892	cytoplasm, nucleus, plasma membrane					0	0
ORC1	PMS1	4.8	2.86746	0.00800534	0.386715	3	-2.3083	2.49513	-0.216564	-1.31353	0.189742	0	1	1	0	2	5	42.86	60	ENSG00000085840	protein_coding	3417	cytoplasm, nucleus, plasma membrane					0	0
ORC1	ABL1	4.8	2.86746	0.00800534	0.386715	3	-2.3083	2.49513	-0.237171	-0.599601	0.549105	0	1	1	0	2	5	42.86	60	ENSG00000085840	protein_coding	5766	cytoplasm, nucleus, plasma membrane					0	0
ORC1	ERCC6	4.8	2.86746	0.00800534	0.386715	3	-2.3083	2.49513	-0.00272704	-0.0105468	0.99159	0	1	1	0	2	5	42.86	60	ENSG00000085840	protein_coding	11026	cytoplasm, nucleus, plasma membrane					0	0
ORC1	CDC42BPG	4.8	2.86746	0.00800534	0.386715	3	-2.3083	2.49513	0.237511	0.553716	0.580077	1	1	1	0	2	5	42.86	60	ENSG00000085840	protein_coding	5742	cytoplasm, nucleus, plasma membrane					0	0
PSMA4	ABL1	5.56	2.85098	0.00832822	0.393033	3	-3.45226	2.11255	-0.825487	-0.679188	0.497404	0	1	1	0	2	5	42.86	60	ENSG00000041357	protein_coding	5766	cytoplasm, nucleus		Oprozomib, Bortezomib, Carfilzomib, Ixazomib Citrate	NEOPLASMS, LEUKEMIA, LEUKEMIA, PROMYELOCYTIC, ACUTE, CARCINOMA, RENAL CELL, LYMPHOMA, FOLLICULAR, MULTIPLE MYELOMA, AMYLOIDOSIS, FAMILIAL, WALDENSTROM MACROGLOBULINEMIA, NEOPLASMS, MUSCULAR DYSTROPHIES, BREAST NEOPLASMS, LEUKEMIA, MYELOID, ACUTE, NEUROBLASTOMA, LYMPHOMA, BRONCHIOLITIS OBLITERANS, LYMPHOMA, LARGE B-CELL, DIFFUSE, MELANOMA, MESOTHELIOMA, GRAFT VS HOST DISEASE, LUNG NEOPLASMS, CARCI…	Inhibitor	0	0
SMC2	PMS1	4.86	2.8276	0.00880733	0.401912	3	-2.28493	2.57811	-0.470705	-1.34767	0.178512	0	1	1	0	2	5	42.86	60	ENSG00000136824	protein_coding	3417	cytoplasm, nucleus					0	0
SMC2	CDC42BPG	4.86	2.8276	0.00880733	0.401912	3	-2.28493	2.57811	-0.721174	-0.793868	0.427734	0	1	1	0	2	5	42.86	60	ENSG00000136824	protein_coding	5742	cytoplasm, nucleus					0	0
PDE6B	P4HB	-5.02	-3.55584	0.00284192	0.444735	2	-4.90718	0.108884	-0.730714	-0.992541	0.321522	1	1	1	0	2	2	28.57	100	ENSG00000133256	protein_coding	2603	plasma membrane					1	0
PDE6B	PRKACA	-5.02	-3.55584	0.00284192	0.444735	2	-4.90718	0.108884	-0.278066	-0.409152	0.682643	1	1	1	0	2	2	28.57	100	ENSG00000133256	protein_coding	3105	plasma membrane					1	0
CDK2	RRM2	6.59	3.55553	0.00284375	0.444757	4	-4.68535	1.90909	0.920158	1.0493	0.294661	1	1	1	0	2	5	57.14	80	ENSG00000123374	protein_coding	3673	cytoplasm, nucleus		Indirubin-3'-Monoxime, SU9516, Bms-387032, Bosutinib, Alvocidib, Tg-02, (7s)-Hydroxyl-Staurosporine, Dinaciclib, Hymenialdisine, Seliciclib, Indirubin Sulfate, Rg-547, Olomoucine, Flavopiridol, Rgb-286638, Ag-24322, Milciclib	NA, NA, NA, NA, LEUKEMIA, LYMPHOCYTIC, CHRONIC, B-CELL, PROSTATIC NEOPLASMS, NEOPLASMS, LYMPHOMA, MULTIPLE MYELOMA, HEMATOLOGIC NEOPLASMS, LEUKEMIA, LYMPHOCYTIC, CHRONIC, B-CELL, MELANOMA, MELANOMA, MULTIPLE MYELOMA, LEUKEMIA, LYMPHOCYTIC, CHRONIC, B-CELL, NA, CARCINOMA, NON-SMALL-CELL LUNG, CYSTIC FIBROSIS, NA, NEOPLASMS, NA, NA, NA, NA, CARCINOMA	Inhibitor	0	0
CDK2	P4HB	6.59	3.55553	0.00284375	0.444757	4	-4.68535	1.90909	0.289746	0.330011	0.741561	1	1	1	0	2	5	57.14	80	ENSG00000123374	protein_coding	2603	cytoplasm, nucleus		Indirubin-3'-Monoxime, SU9516, Bms-387032, Bosutinib, Alvocidib, Tg-02, (7s)-Hydroxyl-Staurosporine, Dinaciclib, Hymenialdisine, Seliciclib, Indirubin Sulfate, Rg-547, Olomoucine, Flavopiridol, Rgb-286638, Ag-24322, Milciclib	NA, NA, NA, NA, LEUKEMIA, LYMPHOCYTIC, CHRONIC, B-CELL, PROSTATIC NEOPLASMS, NEOPLASMS, LYMPHOMA, MULTIPLE MYELOMA, HEMATOLOGIC NEOPLASMS, LEUKEMIA, LYMPHOCYTIC, CHRONIC, B-CELL, MELANOMA, MELANOMA, MULTIPLE MYELOMA, LEUKEMIA, LYMPHOCYTIC, CHRONIC, B-CELL, NA, CARCINOMA, NON-SMALL-CELL LUNG, CYSTIC FIBROSIS, NA, NEOPLASMS, NA, NA, NA, NA, CARCINOMA	Inhibitor	0	0
CDK2	CDK11B	-6.59	-3.55553	0.00284375	0.444757	4	-4.68535	1.90909	0.275961	0.961778	0.336731	0	1	1	0	5	5	57.14	80	ENSG00000123374	protein_coding	2998	cytoplasm, nucleus		Indirubin-3'-Monoxime, SU9516, Bms-387032, Bosutinib, Alvocidib, Tg-02, (7s)-Hydroxyl-Staurosporine, Dinaciclib, Hymenialdisine, Seliciclib, Indirubin Sulfate, Rg-547, Olomoucine, Flavopiridol, Rgb-286638, Ag-24322, Milciclib	NA, NA, NA, NA, LEUKEMIA, LYMPHOCYTIC, CHRONIC, B-CELL, PROSTATIC NEOPLASMS, NEOPLASMS, LYMPHOMA, MULTIPLE MYELOMA, HEMATOLOGIC NEOPLASMS, LEUKEMIA, LYMPHOCYTIC, CHRONIC, B-CELL, MELANOMA, MELANOMA, MULTIPLE MYELOMA, LEUKEMIA, LYMPHOCYTIC, CHRONIC, B-CELL, NA, CARCINOMA, NON-SMALL-CELL LUNG, CYSTIC FIBROSIS, NA, NEOPLASMS, NA, NA, NA, NA, CARCINOMA	Inhibitor	0	0
PABPN1	FUS	4.48	2.67324	0.0126847	0.456024	3	-2.42396	2.05367	0.143249	0.149927	0.880896	1	1	1	0	2	5	42.86	60	ENSG00000100836	protein_coding	5119	cytoplasm, nucleus					0	0
TP53	RRM2	5	3.34368	0.00439929	0.466013	2	-1.78028	3.21684	1.03933	1.47842	0.140067	1	1	1	0	2	5	28.57	40	ENSG00000141510	protein_coding	3673	cytoplasm, endoplasmic reticulum, mitochondrion, nucleus	suppressor, NA, literature, Apoptosis, literature, Cancer Therapy				0	0
UBA1	P4HB	5.73	3.24404	0.00540024	0.478748	3	-2.22353	3.51016	-0.289148	-0.354658	0.723029	0	1	1	0	2	5	42.86	60	ENSG00000130985	protein_coding	2603	cytoplasm, mitochondrion, nucleus					0	0
RACGAP1	RIF1	-5.73	-3.31337	0.0022551	0.48611	3	-4.04405	1.68449	-0.106294	-0.194861	0.845598	1	1	0	0	4	4	42.86	75	ENSG00000161800	protein_coding	15003	cytoplasm, nucleus					0	0
POLR2J	ERCC6	4.14	2.52863	0.0177171	0.495374	3	-2.46912	1.6696	-0.182778	-0.49833	0.61852	0	1	1	0	2	5	42.86	60	ENSG00000005075	protein_coding	11026	nucleus					0	0
POLR2J	FUS	4.14	2.52863	0.0177171	0.495374	3	-2.46912	1.6696	-0.38115	-0.502047	0.615905	0	1	1	0	2	5	42.86	60	ENSG00000005075	protein_coding	5119	nucleus					0	0
ATF4	PRKACA	9.71	2.99761	0.00895012	0.506153	3	-6.7372	2.97779	-0.161016	-0.201261	0.840595	0	1	1	0	2	5	42.86	60	ENSG00000128272	protein_coding	3105	cytoplasm, nucleus					0	0
DHX9	NFIA	-4.33	-2.94408	0.00998301	0.509914	4	-2.90761	1.42068	0.0735966	0.291916	0.770499	0	1	1	0	5	5	57.14	80	ENSG00000135829	protein_coding	9487	cytoplasm, nucleus	oncogene, NA				0	0
IMPACT	P4HB	-4.24	-2.84549	0.0121992	0.514271	2	-3.65745	0.578156	-0.37291	-0.663923	0.507115	1	1	1	0	2	2	28.57	100	ENSG00000154059	protein_coding	2603	cytoplasm					0	0
ADCY6	RRM2	-3.51	-2.40565	0.029377	0.518209	2	-2.73927	0.775022	-0.00438062	-0.00900827	0.992817	1	1	1	0	2	2	28.57	100	ENSG00000174233	protein_coding	3673	plasma membrane					1	0
ADCY6	PRKACA	-3.51	-2.40565	0.029377	0.518209	2	-2.73927	0.775022	0.0437091	0.097466	0.922404	0	1	1	0	2	2	28.57	100	ENSG00000174233	protein_coding	3105	plasma membrane					1	0
DARS	RRM2	4.28	2.39597	0.0299396	0.518561	3	-3.1433	1.1337	-0.263938	-0.24259	0.808445	0	1	1	0	2	5	42.86	60	ENSG00000115866	protein_coding	3673	cytoplasm					0	0
SKP2	RRM2	3.62	2.32667	0.0342741	0.521854	2	-1.95299	1.66488	0.504403	0.871527	0.383979	1	1	1	0	2	5	28.57	40	ENSG00000145604	protein_coding	3673	cytoplasm, nucleus					0	0
GAK	PRKACA	5.26	2.21283	0.0426942	0.530166	4	-4.99036	0.266615	1.04949	1.28488	0.199564	1	1	1	0	2	5	57.14	80	ENSG00000178950	protein_coding	3105	Golgi apparatus					0	0
GAK	P4HB	5.26	2.21283	0.0426942	0.530166	4	-4.99036	0.266615	0.940267	1.06093	0.289349	1	1	1	0	2	5	57.14	80	ENSG00000178950	protein_coding	2603	Golgi apparatus					0	0
GAK	CDK11B	-5.26	-2.21283	0.0426942	0.530166	4	-4.99036	0.266615	0.532011	1.84008	0.0664833	0	1	1	0	5	5	57.14	80	ENSG00000178950	protein_coding	2998	Golgi apparatus					0	0
POLR2D	ERCC6	6.12	2.32693	0.0278532	0.530458	3	-2.1962	3.91994	-2.23878	-3.34815	0.000889122	0	1	1	0	2	5	42.86	60	ENSG00000144231	protein_coding	11026	nucleus					0	0
POLR2D	FUS	6.12	2.32693	0.0278532	0.530458	3	-2.1962	3.91994	0.468837	0.334224	0.738383	1	1	1	0	2	5	42.86	60	ENSG00000144231	protein_coding	5119	nucleus					0	0
CDC45	PMS1	5.19	2.31636	0.0285084	0.531825	3	-2.07816	3.11544	0.0692788	0.34528	0.730062	1	1	1	0	2	5	42.86	60	ENSG00000093009	protein_coding	3417	cytoplasm, nucleus					0	0
CDC45	NSD1	5.19	2.31636	0.0285084	0.531825	3	-2.07816	3.11544	0.727166	1.91165	0.0566214	1	1	1	0	2	5	42.86	60	ENSG00000093009	protein_coding	12892	cytoplasm, nucleus					0	0
CCT3	FUS	4.25	2.28493	0.0305398	0.535714	3	-2.42872	1.82016	-0.0568448	-0.0704148	0.943898	0	1	1	0	2	5	42.86	60	ENSG00000163468	protein_coding	5119	cytoplasm, plasma membrane					0	0
SF3B1	FUS	3.72	2.28344	0.0306389	0.535892	2	-1.56678	2.15249	0.508606	0.547402	0.584402	1	1	1	0	2	5	28.57	40	ENSG00000115524	protein_coding	5119	nucleus	oncogene, NA				0	0
SF3B1	CDK12	3.72	2.28344	0.0306389	0.535892	2	-1.56678	2.15249	0.28785	0.448878	0.653758	1	1	1	0	2	5	28.57	40	ENSG00000115524	protein_coding	8336	nucleus	oncogene, NA				0	0
CKAP5	PDE4DIP	-5.28	-2.13314	0.0403273	0.543943	3	-4.11496	1.16163	-0.0459657	-0.171332	0.864047	1	1	1	0	5	5	42.86	60	ENSG00000175216	protein_coding	8824						0	0
RPA2	APC	-4.19	-2.38171	0.0242806	0.54411	2	-3.00307	1.18995	-0.0253037	-0.0570172	0.954559	1	1	1	0	3	3	28.57	66.67	ENSG00000117748	protein_coding	10701	nucleus					0	0
SCD	FASN	-5.87	-3.50791	0.0023588	0.545827	2	-3.43127	2.44106	-0.00525473	-0.0104995	0.991628	1	1	1	0	2	2	28.57	100	ENSG00000099194	protein_coding	8565	endoplasmic reticulum					1	0
MYL12B	TLN1	5.11	2.18331	0.0380357	0.547049	3	-2.8276	2.28165	-0.257032	-0.453281	0.650587	0	1	1	0	2	5	42.86	60	ENSG00000118680	protein_coding	8823						0	0
EIF2AK4	EIF2B5	-6.36	-2.36831	0.0250212	0.547656	2	-6.9511	-0.590369	0.718019	1.36719	0.172319	0	1	1	0	3	3	28.57	66.67	ENSG00000128829	protein_coding	3460						0	0
CDK4	CDK12	-3.77	-2.17071	0.0390724	0.548382	2	-2.59409	1.17589	0.677105	1.28385	0.199924	0	1	1	0	2	2	28.57	100	ENSG00000135446	protein_coding	8336	nucleus	oncogene, NA	Rg-547, Palbociclib, Alvocidib, Riviciclib, Milciclib, Rgb-286638, Voruciclib, Ribociclib, Ribociclib, Abemaciclib, Ag-24322, Palbociclib, (7s)-Hydroxyl-Staurosporine, G1t28-1	NEOPLASMS, NA, LEUKEMIA, LYMPHOCYTIC, CHRONIC, B-CELL, PROSTATIC NEOPLASMS, NEOPLASMS, LYMPHOMA, MULTIPLE MYELOMA, HEMATOLOGIC NEOPLASMS, NA, CARCINOMA, NA, NA, LYMPHOMA, LIPOSARCOMA, CARCINOMA, HEPATOCELLULAR, LIVER DISEASES, BREAST NEOPLASMS, NEOPLASMS, CARCINOMA, SQUAMOUS CELL, MELANOMA, GLIOBLASTOMA, NA, LIPOSARCOMA, LYMPHOMA, NEOPLASMS, BREAST NEOPLASMS, LYMPHOMA, MANTLE-CELL, CARCINOMA, NON…	Inhibitor	0	1
CDK4	ABL1	-3.77	-2.17071	0.0390724	0.548382	2	-2.59409	1.17589	-0.377399	-0.666893	0.505218	1	1	1	0	2	2	28.57	100	ENSG00000135446	protein_coding	5766	nucleus	oncogene, NA	Rg-547, Palbociclib, Alvocidib, Riviciclib, Milciclib, Rgb-286638, Voruciclib, Ribociclib, Ribociclib, Abemaciclib, Ag-24322, Palbociclib, (7s)-Hydroxyl-Staurosporine, G1t28-1	NEOPLASMS, NA, LEUKEMIA, LYMPHOCYTIC, CHRONIC, B-CELL, PROSTATIC NEOPLASMS, NEOPLASMS, LYMPHOMA, MULTIPLE MYELOMA, HEMATOLOGIC NEOPLASMS, NA, CARCINOMA, NA, NA, LYMPHOMA, LIPOSARCOMA, CARCINOMA, HEPATOCELLULAR, LIVER DISEASES, BREAST NEOPLASMS, NEOPLASMS, CARCINOMA, SQUAMOUS CELL, MELANOMA, GLIOBLASTOMA, NA, LIPOSARCOMA, LYMPHOMA, NEOPLASMS, BREAST NEOPLASMS, LYMPHOMA, MANTLE-CELL, CARCINOMA, NON…	Inhibitor	0	1
TONSL	NSD1	3.09	2.15326	0.0405499	0.55022	2	-1.85752	1.2353	0.783807	1.3254	0.18578	1	1	1	0	2	5	28.57	40	ENSG00000160949	protein_coding	12892	cytoplasm					0	0
CKAP5	EPHA4	5.25	2.1124	0.0442076	0.554517	3	-4.11496	1.13469	1.02679	2.31286	0.0212275	1	1	1	0	2	5	42.86	60	ENSG00000175216	protein_coding	6346						0	0
CKAP5	ABL1	5.25	2.1124	0.0442076	0.554517	3	-4.11496	1.13469	0.404425	0.534891	0.593017	1	1	1	0	2	5	42.86	60	ENSG00000175216	protein_coding	5766						0	0
NDC80	CDC42BPG	6.13	2.06032	0.0492939	0.560081	3	-2.72104	3.40935	-0.220356	-0.338406	0.735231	0	1	1	0	2	5	42.86	60	ENSG00000080986	protein_coding	5742	nucleus					0	0
NDC80	NSD1	6.13	2.06032	0.0492939	0.560081	3	-2.72104	3.40935	0.589531	1.23709	0.216764	1	1	1	0	2	5	42.86	60	ENSG00000080986	protein_coding	12892	nucleus					0	0
NDC80	PMS1	6.13	2.06032	0.0492939	0.560081	3	-2.72104	3.40935	-0.16132	-0.643665	0.520155	0	1	1	0	2	5	42.86	60	ENSG00000080986	protein_coding	3417	nucleus					0	0
BCL2L1	PIK3CA	-7.55	-2.43563	0.0214445	0.562225	3	-4.31301	3.233	-0.930264	-1.33963	0.18111	1	1	1	0	5	5	42.86	60	ENSG00000171552	protein_coding	9093	cytoplasm, mitochondrion	literature, Apoptosis	Obatoclax, Navitoclax	MYELODYSPLASTIC SYNDROMES, PRIMARY MYELOFIBROSIS, LEUKEMIA, LYMPHOCYTIC, CHRONIC, B-CELL, HODGKIN DISEASE, NEOPLASMS, SMALL CELL LUNG CARCINOMA, LEUKEMIA, LYMPHOCYTIC, CHRONIC, B-CELL	Inhibitor	0	1
GAK	TRIO	7.65	2.67914	0.0123922	0.566113	3	-6.27712	1.37513	0.259757	0.537396	0.591287	1	1	1	0	3	4	42.86	75	ENSG00000178950	protein_coding	11100	Golgi apparatus					0	0
EIF5	EIF2B5	-3.56	-2.29175	0.029661	0.568308	2	-3.70696	-0.145169	-0.0952049	-0.164269	0.869601	1	1	1	0	3	3	28.57	66.67	ENSG00000100664	protein_coding	3460	cytoplasm, plasma membrane					0	0
EIF5	STK24	-3.56	-2.29175	0.029661	0.568308	2	-3.70696	-0.145169	0.857231	1.42139	0.155967	0	1	1	0	3	3	28.57	66.67	ENSG00000100664	protein_coding	9361	cytoplasm, plasma membrane					0	0
EP300	MMP1	-3.34	-2.09015	0.0471059	0.576235	2	-1.08828	2.24756	0.979871	1.30842	0.191468	0	1	1	0	5	5	28.57	40	ENSG00000100393	protein_coding	1970	cytoplasm, nucleus	suppressor, NA				0	0
STAG2	PIK3CA	3.23	2.34539	0.0262759	0.583008	2	-2.82106	0.407036	0.385267	1.07023	0.285149	1	1	1	0	5	2	28.57	100	ENSG00000101972	protein_coding	9093	nucleus, plasma membrane	suppressor, NA				0	0
NACA	CARD14	5.29	3.27809	0.00396424	0.586355	4	-2.71352	2.57257	-0.636475	-0.654768	0.512986	0	1	1	0	2	5	57.14	80	ENSG00000196531	protein_coding	4537	cytoplasm, nucleus	oncogene, NA				0	0
GTF3A	STK24	-4.38	-2.2193	0.0347564	0.588892	2	-2.35227	2.0297	0.975173	1.42323	0.155433	0	1	1	0	3	3	28.57	66.67	ENSG00000122034	protein_coding	9361	nucleus					0	0
CKAP5	PIK3CA	5.56	2.31571	0.0280699	0.589746	2	-4.95075	0.610241	-0.0519453	-0.129274	0.897205	0	1	1	0	5	2	28.57	100	ENSG00000175216	protein_coding	9093						0	0

[truncated: 14 more sheets: Supp_Table_S11_Pairs_COAD, Supp_Table_S12_Pairs_DLBCL, Supp_Table_S13_Pairs_MM, Supp_Table_S14_Pairs_LUAD, Supp_Table_S15_Pairs_LCC, Supp_Table_S16_Pairs_NSCLC, Supp_Table_S17_Pairs_SCLC, Supp_Table_S18_Pairs_LUSC, Supp_Table_S19_Pairs_ESCA, Supp_Table_S20_Pairs_OVAD, Supp_Table_S21_Pairs_PDAC, Supp_Table_S22_Pairs_SKCM, Supp_Table_S23_Pairs_STAD, Supp_Table_S24_Pairs_CUADT]
